# Supplementary material for: Retrospective observational study of the influence of the COVID-19 outbreak on infants’ hospitalisation for acute bronchiolitis
Source: PubMed Central journal article supplement — BMJ Open. 2022 Oct 31;12(10):e059626. doi: 10.1136/bmjopen-2021-059626 (PMC9627576; doi:10.1136/bmjopen-2021-059626), 2022-10-31

# BMJ Open

BMJ Open is committed to open peer review. As part of this commitment we make the peer review history of every article we publish publicly available.

When an article is published we post the peer reviewers' comments and the authors' responses online. We also post the versions of the paper that were used during peer review. These are the versions that the peer review comments apply to.

The versions of the paper that follow are the versions that were submitted during the peer review process. They are not the versions of record or the final published versions. They should not be cited or distributed as the published version of this manuscript.

BMJ Open is an open access journal and the full, final, typeset and author-corrected version of record of the manuscript is available on our site with no access controls, subscription charges or pay-per-view fees (<http://bmjopen.bmj.com>).

If you have any questions on BMJ Open's open peer review process please email [info.bmjopen@bmj.com](mailto:info.bmjopen@bmj.com)

# BMJ Open

## Influence of the COVID outbreak on infants' hospitalization for acute bronchiolitis

|                               |                                                                                                                                                                                                                                                                                                                                                                                                                                                                                                                                                                                                                                                                                                                                                                                    |
|-------------------------------|------------------------------------------------------------------------------------------------------------------------------------------------------------------------------------------------------------------------------------------------------------------------------------------------------------------------------------------------------------------------------------------------------------------------------------------------------------------------------------------------------------------------------------------------------------------------------------------------------------------------------------------------------------------------------------------------------------------------------------------------------------------------------------|
| Journal:                      | <i>BMJ Open</i>                                                                                                                                                                                                                                                                                                                                                                                                                                                                                                                                                                                                                                                                                                                                                                    |
| Manuscript ID                 | bmjopen-2021-059626                                                                                                                                                                                                                                                                                                                                                                                                                                                                                                                                                                                                                                                                                                                                                                |
| Article Type:                 | Original research                                                                                                                                                                                                                                                                                                                                                                                                                                                                                                                                                                                                                                                                                                                                                                  |
| Date Submitted by the Author: | 30-Nov-2021                                                                                                                                                                                                                                                                                                                                                                                                                                                                                                                                                                                                                                                                                                                                                                        |
| Complete List of Authors:     | Berdah, Laura; Armand-Trousseau Childrens Hospital, Pediatric Pulmonology<br>Romain, Anne-Sophie; Armand-Trousseau Childrens Hospital, General Pediatrics<br>Rivière, Simon; Assistance Publique - Hopitaux de Paris, Pediatric Emergency Department<br>Schnuriger, Aurélie; Armand-Trousseau Childrens Hospital, Department of Virology<br>Perrier, Marine; AP-HP, Virology Department<br>Carbajal, Ricardo; Hopital Armand-Trousseau, Emergency department<br>Lorrot, Mathie; Armand-Trousseau Childrens Hospital, General Pediatrics<br>Guedj, Romain; Assistance Publique - Hopitaux de Paris, Emergency department Armand Trousseau Hospital<br>Corvol, Harriet; Assistance Publique - Hopitaux de Paris, Pediatric Pulmonology Department; Centre de Recherche Saint Antoine |
| Keywords:                     | COVID-19, Community child health < PAEDIATRICS, Respiratory infections < THORACIC MEDICINE                                                                                                                                                                                                                                                                                                                                                                                                                                                                                                                                                                                                                                                                                         |
|                               |                                                                                                                                                                                                                                                                                                                                                                                                                                                                                                                                                                                                                                                                                                                                                                                    |

SCHOLARONE™  
Manuscripts

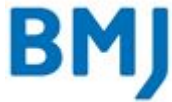

I, the Submitting Author has the right to grant and does grant on behalf of all authors of the Work (as defined in the below author licence), an exclusive licence and/or a non-exclusive licence for contributions from authors who are: i) UK Crown employees; ii) where BMJ has agreed a CC-BY licence shall apply, and/or iii) in accordance with the terms applicable for US Federal Government officers or employees acting as part of their official duties; on a worldwide, perpetual, irrevocable, royalty-free basis to BMJ Publishing Group Ltd ("BMJ") its licensees and where the relevant Journal is co-owned by BMJ to the co-owners of the Journal, to publish the Work in this journal and any other BMJ products and to exploit all rights, as set out in our [licence](#).

The Submitting Author accepts and understands that any supply made under these terms is made by BMJ to the Submitting Author unless you are acting as an employee on behalf of your employer or a postgraduate student of an affiliated institution which is paying any applicable article publishing charge ("APC") for Open Access articles. Where the Submitting Author wishes to make the Work available on an Open Access basis (and intends to pay the relevant APC), the terms of reuse of such Open Access shall be governed by a Creative Commons licence – details of these licences and which [Creative Commons](#) licence will apply to this Work are set out in our licence referred to above.

Other than as permitted in any relevant BMJ Author's Self Archiving Policies, I confirm this Work has not been accepted for publication elsewhere, is not being considered for publication elsewhere and does not duplicate material already published. I confirm all authors consent to publication of this Work and authorise the granting of this licence.

## **Influence of the COVID outbreak on infants' hospitalization for acute bronchiolitis**

Laura Berdah<sup>1,2</sup>, Anne-Sophie Romain<sup>3</sup>, Simon Riviere<sup>4</sup>, Aurélie Schnuriger<sup>2,5</sup>, Marine Perrier<sup>5</sup>, Ricardo Carbajal<sup>4</sup>, Mathie Lorrot<sup>3,6</sup>, Romain Guedj<sup>4</sup>, Harriet Corvol<sup>1,2</sup>

### **Affiliations**

1. Pediatric Pulmonology Department, Trousseau Hospital, Assistance Publique - Hôpitaux de Paris (AP-HP), Paris, France;
2. Sorbonne Université, Centre de Recherche Saint-Antoine (CRSA), Inserm UMR\_S938, Paris, France;
3. Department of General Pediatrics, Trousseau Hospital, AP-HP, Sorbonne Université, Paris ;
4. Pediatric Emergency Department, Hôpital Trousseau, APHP, Sorbonne Université, Paris, France;
5. Virology Department, Trousseau Hospital, AP-HP, Paris, France;
6. Eceve, UMR\_S1123, Paris, France.

**Address correspondence to:** Harriet Corvol,  
Pediatric Pulmonology Department, Trousseau Hospital,  
26 avenue du Dr Netter, 75012 Paris, France  
harriet.corvol@aphp.fr, Tel: +331-71-73-82-90.

**Word count:** 1793

**Key words:** infant, acute bronchiolitis, COVID-19, SARS-CoV-2, RSV, acute lower respiratory infection.

## Abstract

**Objective.** Acute bronchiolitis is a major public health issue with high number of infants hospitalized worldwide each year. In France, hospitalizations mostly occur between October and March, and peak in December. A reduction of emergency visits for bronchiolitis has been observed at onset of the COVID outbreak. We aimed to assess the pandemic effects on the hospitalizations for bronchiolitis during the 2020-2021 winter (COVID-period) compared to 3 previous winters (pre-COVID).

**Study design.** We reviewed the medical records of all infants aged under 12-months, hospitalized for acute bronchiolitis in our pediatric hospital in Paris during the autumn/winter seasons (October 1-March 31) from 2017 to 2021. Clinical and laboratory data were collected using standardized forms.

**Results.** During the COVID-period was observed a 54.3% reduction in hospitalizations for bronchiolitis associated with a delayed peak (February instead of November-December). Clinical characteristics and hospitalization courses were substantially similar. The differences during the COVID period were: smaller proportion of infants with comorbidities, lower need for oxygen, higher proportions of Metapneumovirus, Parainfluenzae 3, Bocavirus, Coronavirus NL63 and OC43, and no Influenza. The three infants positive for SARS-CoV-2 were also positive for RSV, suggesting that SARS-CoV-2 alone does not cause bronchiolitis, despite previous assumptions.

**Conclusions.** The dramatic reduction in infants' hospitalizations for acute bronchiolitis is an opportunity to change our future habits: advising the population to wear masks and apply additional hygiene measures in case of respiratory tract infections. This may drastically change the worldwide bronchiolitis burden and improve children outcomes, as severe bronchiolitis in early childhood is associated with long-term morbidities.

## Article Summary

### Strengths and limitations of this study

- The vast majority of infants admitted to our pediatric hospital between 2017 and 2021 for acute bronchiolitis in their first year after birth will have been identified.
- The clinical and viral characteristics of these infants hospitalized during the COVID-epidemic season 2020-2021 were compared to those of 3 previous winters.
- Three physicians independently reviewed the medical records to collect clinical data and laboratory tests results using a standardized specific form.
- The decrease in the number of hospitalizations may have been partly the consequence of a decrease in the overall number of emergency room visits at the start of the COVID-19 pandemic.

## Introduction

In autumn and winter in the northern hemisphere, community medicine (pediatricians and general practitioners), as well as emergency and general pediatric departments, are usually overwhelmed by children, especially infants, with acute bronchiolitis (1, 2). Hospital pediatric inpatient departments have to reorganize every winter to handle the high number of infants with this acute lower respiratory infection (ALRI), mostly due to the respiratory syncytial virus (RSV) (1-5). Neonates and young infants often require hospitalization in general wards, and some even require ICU care (2, 6). Moreover, RSV is the third leading cause of death in children aged below 5 years (from ALRI, after pneumonia), secondary to *Streptococcus pneumoniae* and *Haemophilus influenzae* type b (2). Acute bronchiolitis is thus a yearly worldwide public health issue. In France, similar epidemic patterns are seen each year with a large majority of hospitalizations between October and March, with a peak in December (7). Management is largely supportive, focusing on maintaining oxygenation and hydration.

The emergence of the coronavirus disease 2019 (COVID-19) pandemic and the global public health responses related to this pandemic have influenced the viruses' epidemiology. A striking reduction of admission for ALRIs in pediatric ICUs was observed during the winter 2020 in the southern hemisphere (8). In France, collective measures to contain the pandemic have been implemented since mid-March 2020, namely lockdowns, curfews, social distancing, requirement of masks, strict hand hygiene, and restriction of commerce activities. We observed a reduction in the visits to the pediatric emergency department of our hospital for bronchiolitis in the autumn 2020 (9). Here, we aimed to assess the effects of the COVID-19 pandemic on the clinical and viral characteristics of infants hospitalized for bronchiolitis during the epidemic season 2020-2021 (COVID period) compared to previous winters (pre-COVID period).

## Methods

### Study design and patients

We retrospectively reviewed the records of all infants aged less than 12 months, hospitalized for acute bronchiolitis in our tertiary university pediatric hospital in Paris (France) during the autumn/winter seasons (October 1 to March 31) from 2017 to 2021 (*i.e.*, 2017-2018; 2018-2019; 2019-2020; and 2020-2021). The study was approved by the local ethics committee of our institution, which waived the need for patient consent (study BronChioVID N°20201119185601).

Patient's selection was performed using the ICD10 code diagnoses of bronchiolitis (J21.0, J21.1, J21.8, and J21.9). Three physicians reviewed the medical records to collect clinical data and laboratory tests results using a standardized specific form. PCR in nasopharyngeal swabs or aspirates for virus identification were performed using Allplex™ Respiratory Panel Assays (Seegene), and/or Simplexa™ Flu A/B & RSV Direct Gen II Kit (Diasorin Molecular).

### Statistical analysis

Patients' characteristics were described using means and percentages. We compared the patients' characteristics between the pre-COVID periods, defined as October 1 to March 31 2017-2018, 2018-2019, and 2019-2020, with those of the COVID period, defined as October 1, 2020 to March 31, 2021. This was done using chi2 and t-tests. The analyses were performed using STATA 14.2.

### Patient and Public Involvement

Patients or the public were not involved in the design, or conduct, or reporting, or dissemination plans of our research.



## Results

### Number of hospitalizations

Over the pre-COVID period, 1,347 infants were hospitalized for bronchiolitis in our hospital, with a mean of 449 infants per year, compared to 205 infants during the COVID period; which corresponds to a 54.3% reduction in the number of hospitalizations (**Table 1**). As shown in **Figure 1**, the bronchiolitis outbreak was delayed during the COVID period, with a peak in the hospitalizations in February, compared to the usual peaks in November-December during the pre-COVID periods.

### Characteristics of the patients

The clinical characteristics of the infants hospitalized for bronchiolitis are shown in **Table 1**. The age distribution and the sex ratio were not significantly different between the pre-COVID and the COVID periods ( $p = 0.3$  and  $0.5$  respectively). During the pre-COVID periods, 14% of the infants presented with comorbidities (with 11% of preterm), whereas only 8% had comorbidities during the COVID period, ( $p = 0.02$ ).

The number of infants who received oxygen therapy was significantly lower during the COVID period than during the pre-COVID period (45% vs 55% respectively,  $p = 0.01$ ). There were no significant differences between the pre-COVID and the COVID periods regarding the length of hospitalization ( $p = 0.8$ ), the number of patients transferred to a pediatric ICU ( $p = 0.6$ ), and the need for non-invasive ( $p = 0.9$ ) or invasive ventilation ( $p = 0.6$ ).

### Viral epidemiology

PCR in nasopharyngeal swabs for virus identification were performed increasingly across the years ( $p < 0.01$ ) (**Table 2**). RSV remains the most common virus found (74%), followed by Rhinovirus and Adenovirus (**Table 2**). The RSV outbreak was significantly

1  
2  
3 delayed during the COVID period compared to the previous winters, with a plateau between  
4  
5 January and March 2021, compared to peaks in November-December during the pre-COVID  
6  
7 periods (**Figure 1**).  
8  
9

10 The proportion of the following viruses was significantly higher during the COVID  
11 period than during the pre-COVID period: Metapneumovirus ( $p = 0.001$ ), Parainfluenzae 3 ( $p$   
12  $< 0.01$ ), Bocavirus ( $p = 0.001$ ), Coronavirus OC43 ( $p < 0.01$ ) and NL63 ( $p < 0.01$ ) (**Table 2**).  
13  
14 No Influenza (A and B) was found during the COVID period. Only 3 infants with bronchiolitis  
15  
16 had a PCR positive for SARS-CoV-2 in nasopharyngeal swabs during the COVID period, but  
17  
18 all 3 were also positive for RSV.  
19  
20  
21  
22  
23  
24  
25  
26  
27  
28  
29  
30  
31  
32  
33  
34  
35  
36  
37  
38  
39  
40  
41  
42  
43  
44  
45  
46  
47  
48  
49  
50  
51  
52  
53  
54  
55  
56  
57  
58  
59  
60

## Discussion

This study highlights the dramatic reduction in the number of infants who required a hospitalization for acute bronchiolitis during the COVID-19 outbreak compared to the three previous years. The outbreak of acute bronchiolitis was not only smaller, but also delayed by several weeks. The clinical characteristics of the infants hospitalized for acute bronchiolitis as well as the hospitalization courses were substantially similar during pre-COVID and COVID periods. While the proportions of RSV and Rhinovirus were similar between both periods, those of Metapneumovirus, Parainfluenzae 3, Bocavirus, Coronavirus NL63 and Coronavirus OC43 increased during the COVID pandemic. Interestingly, during the COVID period, no Influenza was found and the only 3 infants with a PCR positive for SARS-CoV-2 were also positive for RSV, suggesting that SARS-CoV-2 alone does not cause bronchiolitis.

This winter, we observed a strong decrease in the number of hospitalizations for acute bronchiolitis. This observation is consistent with data from Australia and South America (10, 11). Two recent studies confirm our findings and suggest that social distancing and other lockdown strategies are effective in slowing down the spreading of respiratory diseases and decreasing the need for hospitalization among children (12, 13). Indeed, after reaching France on January 2020, a major progression of COVID-19 led to public health prevention interventions. The first national lockdown officially started on March 17, 2020 and ended on May 10, 2020. Masks had to be worn by persons 11 years of age and older in enclosed public places as of July 20, 2020. As shown in this study, the number of hospitalizations for acute bronchiolitis has therefore drastically decreased, even while schools and nurseries have remained open during winter. A recent publication shows the extent to which transmission of common pediatric infections can be altered when close contact with other children is eliminated (14). However, in our study, infants hospitalized for acute bronchiolitis had a mean age of 3.5 months, so a majority of these infants were not yet in collective nurseries, but were at home

1  
2  
3 with their mothers (who were on maternity leave). Moreover, since September 2020,  
4 professionals in nurseries are required to wear a mask in the presence of children. It can  
5 therefore be suggested that the RSV transmission to these young children can also occur through  
6 their parents or older siblings. Intriguingly, we observed a lower proportion of infants with  
7 comorbidities hospitalized during the COVID period. This could be due to the fact that parents  
8 have protected these at-risk children much more for fear that they would develop severe  
9 infections during the pandemic period.

10  
11  
12  
13  
14  
15  
16  
17  
18  
19 The outbreak of acute bronchiolitis was not only lower, but was also delayed by several  
20 weeks. Besides, RSV emerged in January, after the Christmas break. One explanation might be  
21 that families got together during this celebration break, and social distancing measures might  
22 have been followed less strictly. Interestingly, we observed that while the proportions of RSV  
23 and Rhinovirus were similar to that of previous years during the COVID-19 period, those of  
24 Parainfluenzae 3, Bocavirus, Coronavirus NL63 and Coronavirus OC43 were higher. Our  
25 results on the prevalence of the various respiratory viruses during the pre-COVID period are in  
26 agreement with the literature (15). Moreover, during the COVID period, no Influenza was  
27 found, suggestive that this virus is sensitive to the hygiene measures adopted during the  
28 pandemic. A recent epidemiological study on common communicable diseases in the general  
29 population in France during the COVID pandemic also showed that patients who presented  
30 with ALRI symptoms and underwent a PCR test were most likely infected by Influenza in 2019,  
31 but by SARS-CoV-2 or Metapneumovirus in 2020 (16). Moreover, in contradiction to  
32 assumptions made at the pandemic onset, our data suggest that SARS-CoV-2 alone does not  
33 cause bronchiolitis, as the only 3 infants SARS-CoV-2 positive were also positive for RSV. It  
34 will be important to confirm these results in the future, especially if SARS-CoV-2 remains  
35 endemic in the years to come.

1  
2  
3 The high impact of bronchiolitis in terms of cost of hospitalization is not insignificant.  
4  
5 In Italy, a recent study showed that the main cost item is related to young infants, in particular,  
6  
7 those below 3 months of age, and RSV continues to be the main causative agent of severe  
8  
9 bronchiolitis. They highlight that new vaccination strategies, such as the extension of  
10  
11 immunoprophylaxis to infants (17), is essential. Therefore, it would be useful, after the COVID-  
12  
13 19 pandemic, for adults to continue to wear masks and wash their hands regularly to mitigate  
14  
15 the risk of transmission of respiratory infection to young children. Acute severe RSV  
16  
17 bronchiolitis in early childhood is associated with long-term morbidities including recurrent  
18  
19 wheezing, asthma, and lower lung function in later life (18). Therefore, the decrease in the  
20  
21 number of severe bronchiolitis cases due to RSV or other viruses might not only have financial  
22  
23 consequences, but also impact the long-term respiratory outcome of children.  
24  
25  
26  
27

28 We are aware of some limitations of our study. The decrease in the number of  
29  
30 hospitalizations may have been partly the consequence of a decrease in the overall number of  
31  
32 emergency room visits since the start of the COVID-19 pandemic. However, it is likely that,  
33  
34 despite the COVID-19 pandemic, children with the most severe respiratory distress were still  
35  
36 seen in the emergency room. In the UK, a significant reduction of non-urgent health care  
37  
38 demands were observed during the pandemic and were associated with an increase in severe  
39  
40 or urgent cases (19).  
41  
42  
43

44 In conclusion, our work provides an overview of the infants' hospitalizations for acute  
45  
46 bronchiolitis during the COVID period in the winter of 2020-2021. This dramatic reduction in  
47  
48 infants' hospitalizations constitutes a great opportunity to change our habits for future autumn  
49  
50 and winter seasons by advising people, especially adults, to wear masks and increase social  
51  
52 distancing and hygiene measures in case of upper and lower respiratory tract infections. This  
53  
54 may drastically change the worldwide burden of bronchiolitis and hospitalizations caused by  
55  
56  
57  
58  
59  
60

1  
2  
3 RSV in the future, as well have important implications for patient outcomes and prevalence of  
4  
5 asthma in children (20).  
6  
7  
8  
9  
10  
11  
12  
13  
14  
15  
16  
17  
18  
19  
20  
21  
22  
23  
24  
25  
26  
27  
28  
29  
30  
31  
32  
33  
34  
35  
36  
37  
38  
39  
40  
41  
42  
43  
44  
45  
46  
47  
48  
49  
50  
51  
52  
53  
54  
55  
56  
57  
58  
59  
60

For peer review only

## Acknowledgements

The authors would like to thank the medical and nursing staff of the pediatric pulmonology, general pediatric and pediatric emergency departments at Trousseau Hospital, Assistance Publique - Hôpitaux de Paris (AP-HP), Sorbonne Université, Paris, France.

**Contributors:** LB and HC conceptualized and designed the study, collected the data, drafted the initial manuscript, and reviewed and revised the manuscript. RG designed the data collection, collected data, carried out the statistical analyses, and reviewed and revised the manuscript. ASR, SR, AS, MP, ML, RC participated in the study conceptualization and data collection. They also reviewed and revised the manuscript. All authors approved the final manuscript as submitted and agree to be accountable for all aspects of the work.

**Competing Interests:** The authors have no conflicts of interest to disclose.

**Funding:** No funding was secured for this study.

**Conflict of Interest Disclosures:** The authors have no conflicts of interest to disclose.

## References

1. Florin TA, Plint AC, Zorc JJ. Viral bronchiolitis. *Lancet*. 2017;389(10065):211-24.
2. Nair H, Nokes DJ, Gessner BD, Dherani M, Madhi SA, Singleton RJ, et al. Global burden of acute lower respiratory infections due to respiratory syncytial virus in young children: a systematic review and meta-analysis. *Lancet*. 2010;375(9725):1545-55.
3. Wright M, Piedimonte G. Respiratory syncytial virus prevention and therapy: past, present, and future. *Pediatr Pulmonol*. 2011;46(4):324-47.
4. Bont L, Checchia PA, Fauroux B, Figueras-Aloy J, Manzoni P, Paes B, et al. Defining the Epidemiology and Burden of Severe Respiratory Syncytial Virus Infection Among Infants and Children in Western Countries. *Infect Dis Ther*. 2016;5(3):271-98.
5. Obando-Pacheco P, Justicia-Grande AJ, Rivero-Calle I, Rodriguez-Tenreiro C, Sly P, Ramilo O, et al. Respiratory Syncytial Virus Seasonality: A Global Overview. *J Infect Dis*. 2018;217(9):1356-64.
6. Nair H, Simoes EA, Rudan I, Gessner BD, Azziz-Baumgartner E, Zhang JSF, et al. Global and regional burden of hospital admissions for severe acute lower respiratory infections in young children in 2010: a systematic analysis. *Lancet*. 2013;381(9875):1380-90.
7. Che D, Nicolau J, Bergounioux J, Perez T, Bitar D. [Bronchiolitis among infants under 1 year of age in France: epidemiology and factors associated with mortality]. *Arch Pediatr*. 2012;19(7):700-6.
8. Vasquez-Hoyos P, Diaz-Rubio F, Monteverde-Fernandez N, Jaramillo-Bustamante JC, Carvajal C, Serra A, et al. Reduced PICU respiratory admissions during COVID-19. *Arch Dis Child*. 2020.
9. Guedj R, Lorrot M, Lecarpentier T, Leger PL, Corvol H, Carbajal R. Infant bronchiolitis dramatically reduced during the second French COVID-19 outbreak. *Acta Paediatr*. 2021;110(4):1297-9.



- 1  
2  
3 10. Britton PN, Hu N, Saravanos G, Shrapnel J, Davis J, Snelling T, et al. COVID-19 public  
4 health measures and respiratory syncytial virus. *Lancet Child Adolesc Health*. 2020;4(11):e42-  
5  
6 e3.  
7
- 8  
9  
10 11. Nascimento MS, Baggio DM, Fascina LP, do Prado C. Impact of social isolation due to  
11 COVID-19 on the seasonality of pediatric respiratory diseases. *PLoS One*.  
12 2020;15(12):e0243694.  
13  
14
- 15 12. Angoulvant F, Ouldali N, Yang DD, Filser M, Gajdos V, Rybak A, et al. COVID-19  
16 pandemic: Impact caused by school closure and national lockdown on pediatric visits and  
17 admissions for viral and non-viral infections, a time series analysis. *Clin Infect Dis*. 2020.  
18  
19
- 20 13. Hatoun J, Correa ET, Donahue SMA, Vernacchio L. Social Distancing for COVID-19  
21 and Diagnoses of Other Infectious Diseases in Children. *Pediatrics*. 2020;146(4).  
22  
23
- 24 14. Sakamoto H, Ishikane M, Ueda P. Seasonal Influenza Activity During the SARS-CoV-2  
25 Outbreak in Japan. *JAMA*. 2020;323(19):1969-71.  
26  
27
- 28 15. Kenmoe S, Kengne-Nde C, Ebogo-Belobo JT, Mbagu DS, Fatawou Modiyinji A,  
29 Njouom R. Systematic review and meta-analysis of the prevalence of common respiratory  
30 viruses in children < 2 years with bronchiolitis in the pre-COVID-19 pandemic era. *PLoS One*.  
31 2020;15(11):e0242302.  
32  
33
- 34 16. Launay T, Souty C, Vilcu AM, Turbelin C, Blanchon T, Guerrisi C, et al. Common  
35 communicable diseases in the general population in France during the COVID-19 pandemic.  
36 *PLoS One*. 2021;16(10):e0258391.  
37  
38
- 39 17. Bozzola E, Ciarlito C, Guolo S, Brusco C, Cerone G, Antilici L, et al. Respiratory  
40 Syncytial Virus Bronchiolitis in Infancy: The Acute Hospitalization Cost. *Front Pediatr*.  
41 2020;8:594898.  
42  
43  
44  
45  
46  
47  
48  
49  
50  
51  
52  
53  
54  
55  
56  
57  
58  
59  
60

- 1  
2  
3 18. Kitcharoensakkul M, Bacharier LB, Schweiger TL, Wilson B, Goss CW, Lew D, et al.  
4 Lung function trajectories and bronchial hyperresponsiveness during childhood following  
5 severe RSV bronchiolitis in infancy. *Pediatr Allergy Immunol.* 2021;32(3):457-64.  
6  
7  
8  
9  
10 19. Valitutti F, Zenzeri L, Mauro A, Pacifico R, Borrelli M, Muzzica S, et al. Effect of  
11 Population Lockdown on Pediatric Emergency Room Demands in the Era of COVID-19. *Front*  
12 *Pediatr.* 2020;8:521.  
13  
14  
15  
16  
17 20. Shi T, McAllister DA, O'Brien KL, Simoes EAF, Madhi SA, Gessner BD, et al. Global,  
18 regional, and national disease burden estimates of acute lower respiratory infections due to  
19 respiratory syncytial virus in young children in 2015: a systematic review and modelling study.  
20 *Lancet.* 2017;390(10098):946-58.  
21  
22  
23  
24  
25  
26  
27  
28  
29  
30  
31  
32  
33  
34  
35  
36  
37  
38  
39  
40  
41  
42  
43  
44  
45  
46  
47  
48  
49  
50  
51  
52  
53  
54  
55  
56  
57  
58  
59  
60

## Tables

**Table 1.** Clinical characteristics of the infants hospitalized for acute bronchiolitis in a tertiary university pediatric hospital in Paris (France) between 2017 and 2021

|                                          | Pre-COVID period |             |             | COVID period              |             | P-value*    |
|------------------------------------------|------------------|-------------|-------------|---------------------------|-------------|-------------|
|                                          | 2017-2018        | 2018-2019   | 2019-2020   | 2017-2020 aggregated data | 2020-2021   |             |
| <b>Number of infants, n</b>              | <b>479</b>       | <b>451</b>  | <b>417</b>  | <b>1347</b>               | <b>205</b>  | -           |
| <b>Age (months): mean ± SD</b>           | 3.7 (± 3.3)      | 3.6 (± 3.2) | 3.3 (± 2.9) | 3.5                       | 3.3 (± 2.2) | 0.3         |
| <b>Gender: boys, n (%)</b>               | 279 (58.2)       | 249 (55.2)  | 244 (58.5)  | 772 (57)                  | 119 (58)    | 0.5         |
| <b>Co-morbidities, n (%)</b>             | 66 (14)          | 66 (15)     | 53 (13)     | 185 (14)                  | 16 (8)      | <b>0.02</b> |
| <b>Weight (kg): mean (± SD)</b>          | 5.9 (± 3.4)      | 5.7 (±3.5)  | 5.6 (±3.1)  | 5.7 (3.2)                 | 5.8 (±1.6)  | 0.2         |
| <b>Evolution</b>                         |                  |             |             |                           |             |             |
| Duration of hospitalization, days (± SD) | 3.3 (± 4.7)      | 3.5 (± 2.4) | 4.2 (± 3.7) | 3.6 (±3.8)                | 3.4 (± 2.9) | 0.8         |
| Oxygen therapy, n (%)                    | 259 (54)         | 237 (52)    | 257 (61)    | 753 (56)                  | 93 (45)     | <b>0.01</b> |
| ICU, n (%)                               | 48 (13)          | 42 (9)      | 67 (16)     | 157 (12)                  | 21 (11)     | 0.6         |
| <i>Non-invasive ventilation, n (%)</i>   | 42 (8)           | 38 (8)      | 67 (16)     | 147 (11)                  | 22 (12)     | 0.9         |
| <i>Invasive ventilation, n (%)</i>       | 5 (1)            | 5 (1)       | 7 (1.6)     | 17 (1.2)                  | 3 (1.7)     | 0.6         |
| <i>Extracorporeal circulation, n (%)</i> | 2 (0.4)          | 0 (0)       | 2 (0.4)     | 4 (0.2)                   | 0 (0)       | 0.4         |

\*P-value for the comparison between pre-COVID aggregated data and COVID

**Table 2.** Results of the PCR performed in nasopharyngeal swabs for virus identification in the infants hospitalized in pediatric general wards for acute bronchiolitis between 2017 and 2021

|                             | Pre-COVID         |                   |                   | Post-COVID                |                   | P-value*         |
|-----------------------------|-------------------|-------------------|-------------------|---------------------------|-------------------|------------------|
|                             | 2017-2018         | 2018-2019         | 2019-2020         | 2017-2020 aggregated data | 2020-2021         |                  |
| <b>Number of infants, n</b> | <b>479</b>        | <b>451</b>        | <b>417</b>        | <b>1347</b>               | <b>205</b>        |                  |
| <b>Nasal PCR, n (%)</b>     | <b>245 (51.1)</b> | <b>274 (60.7)</b> | <b>281 (67.4)</b> | <b>800 (59.4)</b>         | <b>167 (74.2)</b> | <b>&lt; 0.01</b> |
| <i>RSV</i>                  | 193 (78)          | 202 (73)          | 211 (75)          | 606 (75)                  | 120 (71)          | 0.3              |
| <i>Rhinovirus</i>           | 41 (17)           | 65 (24)           | 63 (22)           | 169 (12)                  | 44 (21)           | 0.1              |
| <i>Adenovirus</i>           | 17 (7)            | 10 (4)            | 14 (5)            | 16 (11)                   | 12 (7)            | 0.3              |
| <i>Metapneumovirus</i>      | 17 (7)            | 10 (4)            | 10 (4)            | 37 (2.7)                  | 19 (11)           | <b>0.001</b>     |
| <i>Influenzae A</i>         | 0 (0)             | 2 (0.4)           | 1 (0.2)           | 3 (0.2)                   | 0 (0)             | 0.4              |
| <i>Influenzae B</i>         | 0 (0)             | 2 (0.7)           | 1 (0.3)           | 3 (0.2)                   | 0 (0)             | 0.4              |
| <i>Parainfluenzae 3</i>     | 9 (4)             | 6 (2)             | 10 (4)            | 27 (2)                    | 16 (10)           | <b>&lt; 0.01</b> |
| <i>Bocavirus</i>            | 6 (2)             | 11 (4)            | 7 (2)             | 24 (1.7)                  | 14 (8)            | <b>0.001</b>     |
| <i>SARS CoV-2</i>           | 0 (0)             | 0 (0)             | 0 (0)             | 0 (0)                     | 3 (2)             | <b>0.02</b>      |
| <i>Coronavirus NL63</i>     | 2 (0.8)           | 5 (2)             | 3 (1)             | 10 (0.7)                  | 9 (5)             | <b>&lt; 0.01</b> |
| <i>Coronavirus OC43</i>     | 0 (0)             | 1 (0.3)           | 2 (0.7)           | 3 (0.2)                   | 7 (4)             | <b>&lt; 0.01</b> |
| <b>No PCR, n (%)</b>        | <b>234 (48.8)</b> | <b>177 (39)</b>   | <b>136 (32)</b>   | <b>547 (40)</b>           | <b>38 (18)</b>    | <b>&lt; 0.01</b> |

\*P-value for the comparison between pre-COVID aggregated data and COVID

1  
2  
3  
4  
5  
6  
7  
8  
9  
10  
11  
12  
13  
14  
15  
16  
17  
18  
19  
20  
21  
22  
23  
24  
25  
26  
27  
28  
29  
30  
31  
32  
33  
34  
35  
36  
37  
38  
39  
40  
41  
42  
43  
44  
45  
46

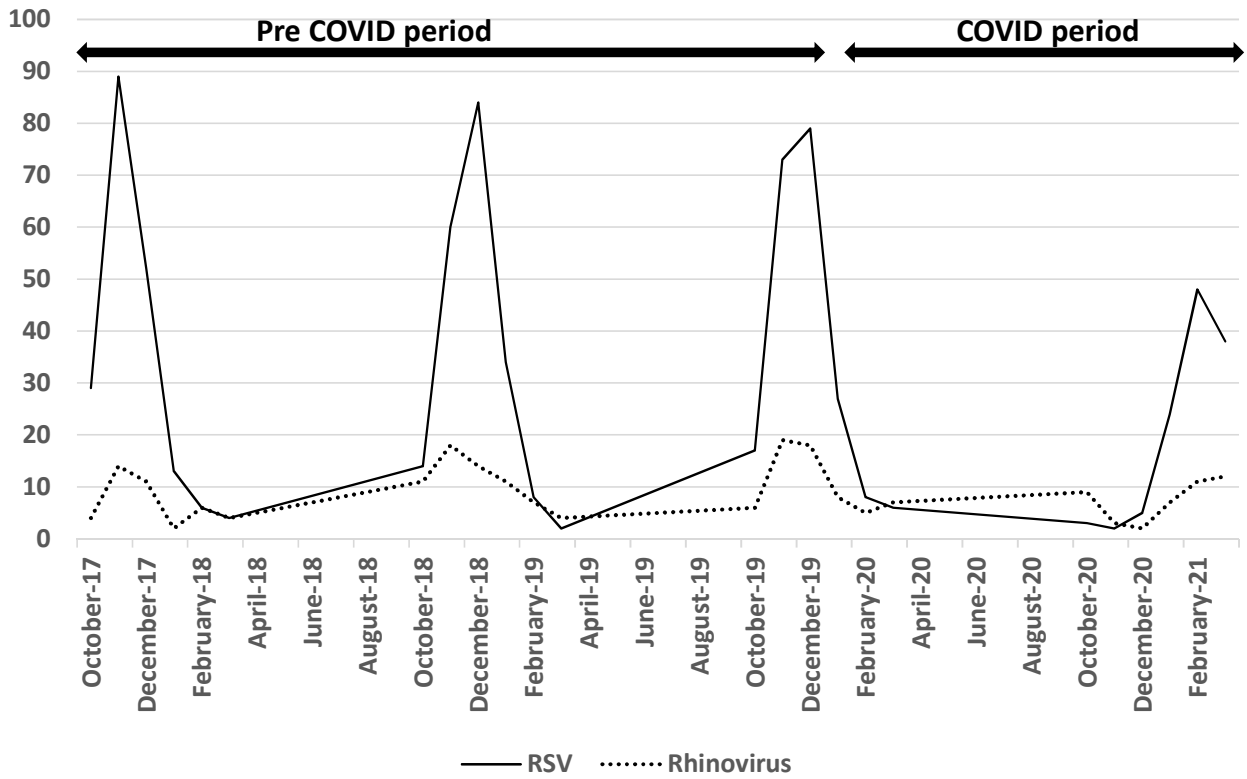

# BMJ Open

## Retrospective observational study of the influence of the COVID outbreak on infants' hospitalisation for acute bronchiolitis

|                                 |                                                                                                                                                                                                                                                                                                                                                                                                                                                                                                                                                                                                                                                                                                                                                                                    |
|---------------------------------|------------------------------------------------------------------------------------------------------------------------------------------------------------------------------------------------------------------------------------------------------------------------------------------------------------------------------------------------------------------------------------------------------------------------------------------------------------------------------------------------------------------------------------------------------------------------------------------------------------------------------------------------------------------------------------------------------------------------------------------------------------------------------------|
| Journal:                        | <i>BMJ Open</i>                                                                                                                                                                                                                                                                                                                                                                                                                                                                                                                                                                                                                                                                                                                                                                    |
| Manuscript ID                   | bmjopen-2021-059626.R1                                                                                                                                                                                                                                                                                                                                                                                                                                                                                                                                                                                                                                                                                                                                                             |
| Article Type:                   | Original research                                                                                                                                                                                                                                                                                                                                                                                                                                                                                                                                                                                                                                                                                                                                                                  |
| Date Submitted by the Author:   | 14-Apr-2022                                                                                                                                                                                                                                                                                                                                                                                                                                                                                                                                                                                                                                                                                                                                                                        |
| Complete List of Authors:       | Berdah, Laura; Armand-Trousseau Childrens Hospital, Pediatric Pulmonology<br>Romain, Anne-Sophie; Armand-Trousseau Childrens Hospital, General Pediatrics<br>Rivière, Simon; Assistance Publique - Hopitaux de Paris, Pediatric Emergency Department<br>Schnuriger, Aurélie; Armand-Trousseau Childrens Hospital, Department of Virology<br>Perrier, Marine; AP-HP, Virology Department<br>Carbajal, Ricardo; Hopital Armand-Trousseau, Emergency department<br>Lorrot, Mathie; Armand-Trousseau Childrens Hospital, General Pediatrics<br>Guedj, Romain; Assistance Publique - Hopitaux de Paris, Emergency department Armand Trousseau Hospital<br>Corvol, Harriet; Assistance Publique - Hopitaux de Paris, Pediatric Pulmonology Department; Centre de Recherche Saint Antoine |
| <b>Primary Subject Heading</b>: | Paediatrics                                                                                                                                                                                                                                                                                                                                                                                                                                                                                                                                                                                                                                                                                                                                                                        |
| Secondary Subject Heading:      | Infectious diseases                                                                                                                                                                                                                                                                                                                                                                                                                                                                                                                                                                                                                                                                                                                                                                |
| Keywords:                       | COVID-19, Community child health < PAEDIATRICS, Respiratory infections < THORACIC MEDICINE                                                                                                                                                                                                                                                                                                                                                                                                                                                                                                                                                                                                                                                                                         |
|                                 |                                                                                                                                                                                                                                                                                                                                                                                                                                                                                                                                                                                                                                                                                                                                                                                    |

SCHOLARONE™  
Manuscripts



I, the Submitting Author has the right to grant and does grant on behalf of all authors of the Work (as defined in the below author licence), an exclusive licence and/or a non-exclusive licence for contributions from authors who are: i) UK Crown employees; ii) where BMJ has agreed a CC-BY licence shall apply, and/or iii) in accordance with the terms applicable for US Federal Government officers or employees acting as part of their official duties; on a worldwide, perpetual, irrevocable, royalty-free basis to BMJ Publishing Group Ltd ("BMJ") its licensees and where the relevant Journal is co-owned by BMJ to the co-owners of the Journal, to publish the Work in this journal and any other BMJ products and to exploit all rights, as set out in our [licence](#).

The Submitting Author accepts and understands that any supply made under these terms is made by BMJ to the Submitting Author unless you are acting as an employee on behalf of your employer or a postgraduate student of an affiliated institution which is paying any applicable article publishing charge ("APC") for Open Access articles. Where the Submitting Author wishes to make the Work available on an Open Access basis (and intends to pay the relevant APC), the terms of reuse of such Open Access shall be governed by a Creative Commons licence – details of these licences and which [Creative Commons](#) licence will apply to this Work are set out in our licence referred to above.

Other than as permitted in any relevant BMJ Author's Self Archiving Policies, I confirm this Work has not been accepted for publication elsewhere, is not being considered for publication elsewhere and does not duplicate material already published. I confirm all authors consent to publication of this Work and authorise the granting of this licence.

1  
2  
3 **Retrospective observational study of the influence of the COVID outbreak on infants'**  
4  
5 **hospitalisation for acute bronchiolitis**  
6  
7

8 Laura Berdah<sup>1,2</sup>, Anne-Sophie Romain<sup>3</sup>, Simon Riviere<sup>4</sup>, Aurélie Schnuriger<sup>2,5</sup>, Marine  
9 Perrier<sup>5</sup>, Ricardo Carbajal<sup>4</sup>, Mathie Lorrot<sup>3,6</sup>, Romain Guedj<sup>4</sup>, Harriet Corvol<sup>1,2</sup>  
10  
11  
12  
13

14 **Affiliations**

- 15  
16  
17 1. Paediatric Pulmonology Department, Trousseau Hospital, Assistance Publique - Hôpitaux de  
18 Paris (AP-HP), Paris, France;  
19  
20 2. Sorbonne Université, Centre de Recherche Saint-Antoine (CRSA), Inserm UMR\_S938,  
21 Paris, France;  
22  
23 3. Department of General Paediatrics, Trousseau Hospital, AP-HP, Sorbonne Université, Paris,  
24 France;  
25  
26 4. Paediatric Emergency Department, Hôpital Trousseau, APHP, Sorbonne Université, Paris,  
27 France;  
28  
29 5. Virology Department, Trousseau Hospital, AP-HP, Paris, France;  
30  
31 6. Eceve, UMR\_S1123, Paris, France.  
32  
33  
34  
35  
36  
37  
38  
39  
40  
41

42 **Address correspondence to:** Harriet Corvol,  
43 Paediatric Pulmonology Department, Trousseau Hospital,  
44 26 avenue du Dr Netter, 75012 Paris, France  
45 harriet.corvol@aphp.fr, Tel: +331-71-73-82-90.  
46  
47  
48  
49  
50  
51  
52

53 **Word count:** 2158

54  
55 **Key words:** infant, acute bronchiolitis, COVID-19, SARS-CoV-2, RSV, acute lower  
56 respiratory infection.  
57  
58  
59  
60



## Abstract

**Objectives.** Acute bronchiolitis is a major public health issue with high number of infants hospitalised worldwide each year. In France, hospitalisations mostly occur between October and March, and peak in December. A reduction of emergency visits for bronchiolitis has been observed at onset of the COVID outbreak. We aimed to assess the pandemic effects on the hospitalisations for bronchiolitis during the 2020-2021 winter (COVID-period) compared to 3 previous winters (pre-COVID).

**Design.** Retrospective, observational and cross-sectional study.

**Setting.** Tertiary university paediatric hospital in Paris (France).

**Participants.** All infants aged under 12-months who were hospitalised for acute bronchiolitis during the autumn/winter seasons (October 1-March 31) from 2017 to 2021 were included. Clinical and laboratory data were collected using standardized forms.

**Results.** During the COVID-period was observed a 54.3% reduction in hospitalisations for bronchiolitis associated with a delayed peak (February instead of November-December). Clinical characteristics and hospitalisation courses were substantially similar. The differences during the COVID period were: smaller proportion of infants with comorbidities (14% vs 8%  $p = 0.02$ ), lower need for oxygen (45% vs 55%,  $p = 0.01$ ), higher proportions of Metapneumovirus, Parainfluenzae 3, Bocavirus, Coronavirus NL63 and OC43 (all  $p \leq 0.01$ ), and no Influenza. The three infants positive for SARS-CoV-2 were also positive for RSV, suggesting that SARS-CoV-2 alone does not cause bronchiolitis, despite previous assumptions.

**Conclusion.** The dramatic reduction in infants' hospitalisations for acute bronchiolitis is an opportunity to change our future habits such as advising the population to wear masks and apply additional hygiene measures in case of respiratory tract infections. This may change the worldwide bronchiolitis burden and improve children respiratory outcomes.

1  
2  
3 **Data availability statement:** Data are available upon reasonable request.  
4  
5  
6  
7

8 **Strengths and limitations of this study**  
9

- 10  
11 • The vast majority of infants admitted to our paediatric hospital between 2017 and 2021  
12 for acute bronchiolitis in their first year after birth will have been identified.  
13  
14  
15  
16 • The clinical and viral characteristics of these infants hospitalised during the COVID-  
17 epidemic season 2020-2021 were compared to those of 3 previous winters.  
18  
19  
20  
21  
22 • Three physicians independently reviewed the medical records to collect clinical data  
23 and laboratory tests results using a standardized specific form.  
24  
25  
26  
27  
28  
29  
30  
31  
32  
33  
34  
35  
36  
37  
38  
39  
40  
41  
42  
43  
44  
45  
46  
47  
48  
49  
50  
51  
52  
53  
54  
55  
56  
57  
58  
59  
60

## Introduction

In autumn and winter in the northern hemisphere, community medicine (paediatricians and general practitioners), as well as emergency and general paediatric departments, are usually overwhelmed by children, especially infants, with acute bronchiolitis (1, 2). Hospital paediatric inpatient departments have to reorganize every winter to handle the high number of infants with this acute lower respiratory infection (ALRI), mostly due to the respiratory syncytial virus (RSV) (1-5). Neonates and young infants often require hospitalisation in general wards, and some even require intensive care unit (ICU) care (2, 6). Moreover, RSV is the third leading cause of death in children aged below 5 years (from ALRI, after pneumonia), secondary to *Streptococcus pneumoniae* and *Haemophilus influenzae* type b (2). Acute bronchiolitis is thus a yearly worldwide public health issue. In France, similar epidemic patterns are seen each year with a large majority of hospitalisations between October and March, with a peak in December (7). Management is largely supportive, focusing on maintaining oxygenation and hydration.

The emergence of the coronavirus disease 2019 (COVID-19) pandemic and the global public health responses related to this pandemic have influenced the viruses' epidemiology. A striking reduction of admission for ALRIs in paediatric ICUs was observed during the winter 2020 in the southern hemisphere (8). In France, collective measures to contain the pandemic have been implemented since mid-March 2020, namely lockdowns, curfews, social distancing, requirement of masks, strict hand hygiene, and restriction of commerce activities. We observed a reduction in the visits to the paediatric emergency department of our hospital for bronchiolitis in the autumn 2020 (9). Here, we aimed to assess the effects of the COVID-19 pandemic on the clinical and viral characteristics of infants hospitalised for bronchiolitis during the epidemic season 2020-2021 (COVID period) compared to previous winters (pre-COVID period).

## Methods

### Study design and patients

This retrospective, observational and cross-sectional study was conducted in the Paediatric University Hospital Armand Trousseau, Assistance Publique Hôpitaux de Paris (APHP), in Paris (France). All infants aged less than 12 months, hospitalised for a first episode of acute bronchiolitis during the autumn/winter seasons (October 1 to March 31) from 2017 to 2021 (*i.e.*, 2017-2018; 2018-2019; 2019-2020; and 2020-2021) were included. Exclusion criteria were age over 12 months, a second episode (or more) of bronchiolitis, and/or an asthma attack. The study was approved by the Institutional Review Board of the French Society for Respiratory Medicine (*Société de Pneumologie de Langue Française*, #CEPRO\_2020-080). In accordance with French laws for observational studies, the requirement for written informed consent was waived (study BronChioVID N°20201119185601).

Patient's selection was performed using the ICD10 code diagnoses of bronchiolitis (J21.0, J21.1, J21.8, and J21.9). Three physicians reviewed the medical records to collect demographic and clinical data as well as laboratory tests results using a standardized specific form. The demographic data collected comprised date of birth, gender and underlying conditions such as prematurity, bronchopulmonary dysplasia, intrauterine growth retardation, congenital heart disease, sickle cell disease, and genetic disease. The clinical data collected at the time of the bronchiolitis episode included date, age, weight, results of the PCR in nasopharyngeal swabs or aspirates for virus identification (Allplex™ Respiratory Panel Assays [Seegene], and/or Simplexa™ Flu A/B & RSV Direct Gen II Kit [Diasorin Molecular]), and medical evolution with duration of the hospitalisation, hospitalisation in ICU, respiratory support (oxygen therapy, high-flow nasal cannula oxygen therapy, non-invasive ventilation, invasive ventilation, and extracorporeal membrane oxygenation [ECMO]), and nutritional support.

### Statistical analysis

The normality of the distribution for continuous variables was tested using the Shapiro-wilk test and was rejected for each variable. Patients' characteristics were described as medians with interquartile range for continuous variables and percentages for categorical variables. We compared the patients' characteristics between the pre-COVID periods, defined as October 1 to March 31 2017-2018, 2018-2019, and 2019-2020, with those of the COVID period, defined as October 1, 2020 to March 31, 2021, by using a chi-square test for categorical variables and a Mann-Whitney test for continuous variables. The analyses were performed using STATA 14.2.

### Patient and Public Involvement

Patients or the public were not involved in the design, or conduct, or reporting, or dissemination plans of our research.

## Results

### Number of hospitalisations

Over the pre-COVID period, 1,347 infants were hospitalised for bronchiolitis in our hospital, with a mean of 449 infants per winter, compared to 205 infants during the COVID period; which corresponds to a 54.3% reduction in the number of hospitalisations (**Table 1**). As shown in **Figure 1**, the bronchiolitis outbreak was delayed during the COVID period, with a peak in the hospitalisations in February, compared to the usual peaks in November-December during the pre-COVID periods.

### Characteristics of the patients

The clinical characteristics of the infants hospitalised for bronchiolitis are shown in **Table 1**. The age distribution and the sex ratio were not significantly different between the pre-COVID and the COVID periods ( $p = 0.7$  and  $0.5$  respectively). During the pre-COVID periods, 14% of the infants presented with comorbidities (with 11% of preterm), whereas only 8% had comorbidities during the COVID period, ( $p = 0.02$ ).

The number of infants who received oxygen therapy was significantly lower during the COVID period than during the pre-COVID period (45% vs 55% respectively,  $p = 0.01$ ). There were no significant differences between the pre-COVID and the COVID periods regarding the length of hospitalisation ( $p = 0.3$ ), the number of patients transferred to a paediatric ICU ( $p = 0.6$ ), and the need for non-invasive ( $p = 0.9$ ) or invasive ventilation ( $p = 0.6$ ).

### Viral epidemiology

PCR in nasopharyngeal swabs for virus identification were performed increasingly across the years ( $p < 0.01$ ) (**Table 2**). RSV remains the most common virus found (74%), followed by Rhinovirus and Adenovirus (**Table 2**). The RSV outbreak was significantly

1  
2  
3 delayed during the COVID period compared to the previous winters, with a plateau between  
4  
5 January and March 2021, compared to peaks in November-December during the pre-COVID  
6  
7 periods (**Figure 1**).  
8  
9

10 The proportion of the following viruses was significantly higher during the COVID  
11 period than during the pre-COVID period: Metapneumovirus ( $p = 0.001$ ), Parainfluenzae 3 ( $p$   
12  $< 0.01$ ), Bocavirus ( $p = 0.001$ ), Coronavirus OC43 ( $p < 0.01$ ) and NL63 ( $p < 0.01$ ) (**Table 2**).  
13  
14 No Influenza (A and B) was found during the COVID period. Only 3 infants with bronchiolitis  
15  
16 had a PCR positive for SARS-CoV-2 in nasopharyngeal swabs during the COVID period, but  
17  
18 all 3 were also positive for RSV.  
19  
20  
21  
22  
23  
24  
25  
26  
27  
28  
29  
30  
31  
32  
33  
34  
35  
36  
37  
38  
39  
40  
41  
42  
43  
44  
45  
46  
47  
48  
49  
50  
51  
52  
53  
54  
55  
56  
57  
58  
59  
60

## Discussion

This study highlights the dramatic reduction in the number of infants who required a hospitalisation for acute bronchiolitis during the COVID-19 outbreak compared to the three previous years. The outbreak of acute bronchiolitis was not only smaller, but also delayed by several weeks. The clinical characteristics of the infants hospitalised for acute bronchiolitis as well as the hospitalisation courses were substantially similar during pre-COVID and COVID periods. While the proportions of RSV and Rhinovirus were similar between both periods, those of Metapneumovirus, Parainfluenzae 3, Bocavirus, Coronavirus NL63 and Coronavirus OC43 increased during the COVID pandemic. Interestingly, during the COVID period, no Influenza was found and the only 3 infants with a PCR positive for SARS-CoV-2 were also positive for RSV, suggesting that SARS-CoV-2 alone does not cause bronchiolitis.

This winter, we observed a strong decrease in the number of hospitalisations for acute bronchiolitis. This observation is consistent with data first from the southern hemisphere, Australia and South America (10, 11), and, more recently, from Europe and North-America (9, 12-15). Several studies reported reductions in the rate of admission to paediatric emergency departments for acute bronchiolitis during the COVID-19 outbreak (9, 13). Results similar to ours were reported in Belgium with a dramatic decrease in bronchiolitis hospitalisations and very limited RSV positive as compared to the last three years (15). Two recent studies also suggest that social distancing and other lockdown strategies are effective in slowing down the spreading of respiratory diseases and decreasing the need for hospitalisation among children (12, 14). Indeed, after reaching France on January 2020, a major progression of COVID-19 led to public health prevention interventions. The first national lockdown officially started on March 17, 2020 and ended on May 10, 2020. Masks had to be worn by persons 11 years of age and older in enclosed public places as of July 20, 2020. As shown in this study, the number of hospitalisations for acute bronchiolitis has therefore drastically decreased, even while schools



1  
2  
3 and nurseries have remained open during winter. A recent publication shows the extent to which  
4 transmission of common paediatric infections can be altered when close contact with other  
5 children is eliminated (16). However, in our study, infants hospitalised for acute bronchiolitis  
6 had a mean age of 3.5 months, so a majority of these infants were not yet in collective nurseries,  
7 but were at home with their mothers (who were on maternity leave). Moreover, since September  
8 2020, professionals in nurseries are required to wear a mask in the presence of children. It can  
9 therefore be suggested that the RSV transmission to these young children can also occur through  
10 their parents or older siblings. Intriguingly, we observed a lower proportion of infants with  
11 comorbidities hospitalised during the COVID period. This could be due to the fact that parents  
12 have protected these at-risk children much more for fear that they would develop severe  
13 infections during the pandemic period.  
14  
15  
16  
17  
18  
19  
20  
21  
22  
23  
24  
25  
26  
27

28 The outbreak of acute bronchiolitis was not only lower, but was also delayed by several  
29 weeks. Besides, RSV emerged in January, after the Christmas break. One explanation might be  
30 that families got together during this celebration break, and social distancing measures might  
31 have been followed less strictly. Interestingly, we observed that while the proportions of RSV  
32 and Rhinovirus were similar to that of previous years during the COVID-19 period, those of  
33 Parainfluenzae 3, Bocavirus, Coronavirus NL63 and Coronavirus OC43 were higher. Our  
34 results on the prevalence of the various respiratory viruses during the pre-COVID period are in  
35 agreement with the literature (17). Moreover, during the COVID period, no Influenza was  
36 found, suggestive that this virus is sensitive to the hygiene measures adopted during the  
37 pandemic. A recent epidemiological study on common communicable diseases in the general  
38 population in France during the COVID pandemic also showed that patients who presented  
39 with ALRI symptoms and underwent a PCR test were most likely infected by Influenza in 2019,  
40 but by SARS-CoV-2 or Metapneumovirus in 2020 (18). Moreover, in contradiction to  
41 assumptions made at the pandemic onset, our data suggest that SARS-CoV-2 alone does not  
42  
43  
44  
45  
46  
47  
48  
49  
50  
51  
52  
53  
54  
55  
56  
57  
58  
59  
60

1  
2  
3 cause bronchiolitis, as the only 3 infants SARS-CoV-2 positive were also positive for RSV. It  
4  
5 will be important to confirm these results in the future, especially if SARS-CoV-2 remains  
6  
7  
8  
9  
10  
11  
12  
13  
14  
15  
16  
17  
18  
19  
20  
21  
22  
23  
24  
25  
26  
27  
28  
29  
30  
31  
32  
33  
34  
35  
36  
37  
38  
39  
40  
41  
42  
43  
44  
45  
46  
47  
48  
49  
50  
51  
52  
53  
54  
55  
56  
57  
58  
59  
60

cause bronchiolitis, as the only 3 infants SARS-CoV-2 positive were also positive for RSV. It will be important to confirm these results in the future, especially if SARS-CoV-2 remains endemic in the years to come.

The high impact of bronchiolitis in terms of cost of hospitalisation is not insignificant. In Italy, a recent study showed that the main cost item is related to young infants, in particular, those below 3 months of age, and RSV continues to be the main causative agent of severe bronchiolitis (19). The authors highlight that new vaccination strategies, such as the extension of immunoprophylaxis to infants is essential. Therefore, it would be useful, after the COVID-19 pandemic, for adults to continue to wear masks and wash their hands regularly to mitigate the risk of transmission of respiratory infection to young children. Acute severe RSV bronchiolitis in early childhood is associated with long-term morbidities including recurrent wheezing, asthma, and lower lung function in later life (20). Therefore, the decrease in the number of severe bronchiolitis cases due to RSV or other viruses might not only have financial consequences, but also impact the long-term respiratory outcome of children.

We are aware of some limitations of our study. The decrease in the number of hospitalisations may have been partly the consequence of a decrease in the overall number of emergency room visits since the start of the COVID-19 pandemic. However, it is likely that, despite the COVID-19 pandemic, children with the most severe respiratory distress were still seen in the emergency room. In the UK, a significant reduction of non-urgent health care demands were observed during the pandemic and were associated with an increase in severe or urgent cases (21).

In conclusion, our work provides an overview of the infants' hospitalisations for acute bronchiolitis during the COVID period in the winter of 2020-2021. This dramatic reduction in infants' hospitalizations constitutes a great opportunity to change our habits for future autumn and winter seasons by advising people, especially adults, to wear masks and increase social

1  
2  
3 distancing and hygiene measures in case of upper and lower respiratory tract infections. This  
4  
5 may drastically change the worldwide burden of bronchiolitis and hospitalisations caused by  
6  
7 RSV in the future, as well have important implications for patient outcomes and prevalence of  
8  
9 asthma in children (22). The scientific community should nevertheless keep close surveillance  
10  
11 of RSV epidemics since, as underlined by Di Mattia et al., the increase of an immunologically  
12  
13 naïve population with infants born from mothers who have not reinforced their immunity to  
14  
15 RSV, could lead to greater epidemics in the next winters (23).  
16  
17  
18  
19  
20  
21  
22  
23  
24  
25  
26  
27  
28  
29  
30  
31  
32  
33  
34  
35  
36  
37  
38  
39  
40  
41  
42  
43  
44  
45  
46  
47  
48  
49  
50  
51  
52  
53  
54  
55  
56  
57  
58  
59  
60

For peer review only

## Acknowledgements

The authors would like to thank the medical and nursing staff of the paediatric pulmonology, general paediatric and paediatric emergency departments at Trousseau Hospital, Assistance Publique - Hôpitaux de Paris (AP-HP), Sorbonne Université, Paris, France.

**Contributors:** LB and HC conceptualized and designed the study, collected the data, drafted the initial manuscript, and reviewed and revised the manuscript. RG designed the data collection, collected data, carried out the statistical analyses, and reviewed and revised the manuscript. ASR, SR, AS, MP, ML, RC participated in the study conceptualization and data collection. They also reviewed and revised the manuscript. All authors approved the final manuscript as submitted and agree to be accountable for all aspects of the work.

**Competing Interests:** The authors have no conflicts of interest to disclose.

**Funding:** No funding was secured for this study.

**Conflict of Interest Disclosures:** The authors have no conflicts of interest to disclose.

1  
2  
3 **Figure's caption**  
4  
5  
6

7 **Figure 1.** Evolution of the number of RSV and Rhinovirus cases during the pre-COVID period  
8 (between 2017 and 2020) and the COVID period (2020-2021)  
9  
10  
11  
12  
13  
14  
15  
16  
17  
18  
19  
20  
21  
22  
23  
24  
25  
26  
27  
28  
29  
30  
31  
32  
33  
34  
35  
36  
37  
38  
39  
40  
41  
42  
43  
44  
45  
46  
47  
48  
49  
50  
51  
52  
53  
54  
55  
56  
57  
58  
59  
60

For peer review only

## References

1. Florin TA, Plint AC, Zorc JJ. Viral bronchiolitis. *Lancet*. 2017;389(10065):211-24.
2. Nair H, Nokes DJ, Gessner BD, Dherani M, Madhi SA, Singleton RJ, et al. Global burden of acute lower respiratory infections due to respiratory syncytial virus in young children: a systematic review and meta-analysis. *Lancet*. 2010;375(9725):1545-55.
3. Wright M, Piedimonte G. Respiratory syncytial virus prevention and therapy: past, present, and future. *Pediatr Pulmonol*. 2011;46(4):324-47.
4. Bont L, Checchia PA, Fauroux B, Figueras-Aloy J, Manzoni P, Paes B, et al. Defining the Epidemiology and Burden of Severe Respiratory Syncytial Virus Infection Among Infants and Children in Western Countries. *Infect Dis Ther*. 2016;5(3):271-98.
5. Obando-Pacheco P, Justicia-Grande AJ, Rivero-Calle I, Rodriguez-Tenreiro C, Sly P, Ramilo O, et al. Respiratory Syncytial Virus Seasonality: A Global Overview. *J Infect Dis*. 2018;217(9):1356-64.
6. Nair H, Simoes EA, Rudan I, Gessner BD, Azziz-Baumgartner E, Zhang JSF, et al. Global and regional burden of hospital admissions for severe acute lower respiratory infections in young children in 2010: a systematic analysis. *Lancet*. 2013;381(9875):1380-90.
7. Che D, Nicolau J, Bergounioux J, Perez T, Bitar D. [Bronchiolitis among infants under 1 year of age in France: epidemiology and factors associated with mortality]. *Arch Pediatr*. 2012;19(7):700-6.
8. Vasquez-Hoyos P, Diaz-Rubio F, Monteverde-Fernandez N, Jaramillo-Bustamante JC, Carvajal C, Serra A, et al. Reduced PICU respiratory admissions during COVID-19. *Arch Dis Child*. 2020.
9. Guedj R, Lorrot M, Lecarpentier T, Leger PL, Corvol H, Carbajal R. Infant bronchiolitis dramatically reduced during the second French COVID-19 outbreak. *Acta Paediatr*. 2021;110(4):1297-9.

10. Britton PN, Hu N, Saravanos G, Shrapnel J, Davis J, Snelling T, et al. COVID-19 public health measures and respiratory syncytial virus. *Lancet Child Adolesc Health*. 2020;4(11):e42-e3.
11. Nascimento MS, Baggio DM, Fascina LP, do Prado C. Impact of social isolation due to COVID-19 on the seasonality of pediatric respiratory diseases. *PLoS One*. 2020;15(12):e0243694.
12. Angoulvant F, Ouldali N, Yang DD, Filser M, Gajdos V, Rybak A, et al. COVID-19 pandemic: Impact caused by school closure and national lockdown on pediatric visits and admissions for viral and non-viral infections, a time series analysis. *Clin Infect Dis*. 2020.
13. Curatola A, Lazzareschi I, Bersani G, Covino M, Gatto A, Chiaretti A. Impact of COVID-19 outbreak in acute bronchiolitis: Lesson from a tertiary Italian Emergency Department. *Pediatr Pulmonol*. 2021;56(8):2484-8.
14. Hatoun J, Correa ET, Donahue SMA, Vernacchio L. Social Distancing for COVID-19 and Diagnoses of Other Infectious Diseases in Children. *Pediatrics*. 2020;146(4).
15. Van Brusselen D, De Troeyer K, Ter Haar E, Vander Auwera A, Poschet K, Van Nuijs S, et al. Bronchiolitis in COVID-19 times: a nearly absent disease? *Eur J Pediatr*. 2021;180(6):1969-73.
16. Sakamoto H, Ishikane M, Ueda P. Seasonal Influenza Activity During the SARS-CoV-2 Outbreak in Japan. *JAMA*. 2020;323(19):1969-71.
17. Kenmoe S, Kengne-Nde C, Ebogo-Belobo JT, Mbaga DS, Fatawou Modiyinji A, Njouom R. Systematic review and meta-analysis of the prevalence of common respiratory viruses in children < 2 years with bronchiolitis in the pre-COVID-19 pandemic era. *PLoS One*. 2020;15(11):e0242302.

- 1  
2  
3 18. Launay T, Souty C, Vilcu AM, Turbelin C, Blanchon T, Guerrisi C, et al. Common  
4 communicable diseases in the general population in France during the COVID-19 pandemic.  
5 PLoS One. 2021;16(10):e0258391.  
6  
7  
8  
9  
10 19. Bozzola E, Ciarlito C, Guolo S, Brusco C, Cerone G, Antilici L, et al. Respiratory  
11 Syncytial Virus Bronchiolitis in Infancy: The Acute Hospitalization Cost. *Front Pediatr.*  
12 2020;8:594898.  
13  
14  
15  
16 20. Kitcharoensakkul M, Bacharier LB, Schweiger TL, Wilson B, Goss CW, Lew D, et al.  
17 Lung function trajectories and bronchial hyperresponsiveness during childhood following  
18 severe RSV bronchiolitis in infancy. *Pediatr Allergy Immunol.* 2021;32(3):457-64.  
19  
20  
21  
22  
23 21. Valitutti F, Zenzeri L, Mauro A, Pacifico R, Borrelli M, Muzzica S, et al. Effect of  
24 Population Lockdown on Pediatric Emergency Room Demands in the Era of COVID-19. *Front*  
25 *Pediatr.* 2020;8:521.  
26  
27  
28  
29  
30 22. Shi T, McAllister DA, O'Brien KL, Simoes EAF, Madhi SA, Gessner BD, et al. Global,  
31 regional, and national disease burden estimates of acute lower respiratory infections due to  
32 respiratory syncytial virus in young children in 2015: a systematic review and modelling study.  
33 *Lancet.* 2017;390(10098):946-58.  
34  
35  
36  
37  
38  
39  
40 23. Di Mattia G, Nenna R, Mancino E, Rizzo V, Pierangeli A, Villani A, et al. During the  
41 COVID-19 pandemic where has respiratory syncytial virus gone? *Pediatr Pulmonol.*  
42 2021;56(10):3106-9.  
43  
44  
45  
46  
47  
48  
49  
50  
51  
52  
53  
54  
55  
56  
57  
58  
59  
60



## Tables

**Table 1.** Clinical characteristics of the infants hospitalised for acute bronchiolitis in a tertiary university paediatric hospital in Paris (France) between 2017 and 2021

|                                                  | Pre-COVID period |               |               | COVID period              |               | P-value*    |
|--------------------------------------------------|------------------|---------------|---------------|---------------------------|---------------|-------------|
|                                                  | 2017-2018        | 2018-2019     | 2019-2020     | 2017-2020 aggregated data | 2020-2021     |             |
| <b>Number of infants, n</b>                      | <b>479</b>       | <b>451</b>    | <b>417</b>    | <b>1347</b>               | <b>205</b>    | -           |
| <b>Age (months): median (IQR)</b>                | 2.8 (1.5-4.9)    | 2.6 (1.4-4.8) | 2.4 (1.3-4.4) | 2.5 (1.4-4.7)             | 2.7 (1.5-4.7) | 0.7         |
| <b>Gender: boys, n (%)</b>                       | 279 (58.2)       | 249 (55.2)    | 244 (58.5)    | 772 (57)                  | 119 (58)      | 0.5         |
| <b>Comorbidities, n (%)</b>                      | 66 (14)          | 66 (15)       | 53 (13)       | 185 (14)                  | 16 (8)        | <b>0.02</b> |
| <b>Weight (kg): median (IQR)</b>                 | 5.6 (4.4-6.9)    | 5.5 (4.6-7.0) | 5.4 (4.3-7.0) | 5.5 (4.4-7.0)             | 5.7 (4.5-6.9) | 0.6         |
| <b>Evolution</b>                                 |                  |               |               |                           |               |             |
| Duration of hospitalisation (days), median (IQR) | 2.4 (1.2-4.0)    | 3.0 (2.0-4.0) | 3.9 (2.0-5.0) | 3.0 (2.0-4.9)             | 3.0 (1.5-4.2) | 0.3         |
| Oxygen therapy, n (%)                            | 259 (54)         | 237 (52)      | 257 (61)      | 753 (56)                  | 93 (45)       | <b>0.01</b> |
| Intensive Care Unit, n (%)                       | 48 (13)          | 42 (9)        | 67 (16)       | 157 (12)                  | 21 (11)       | 0.6         |
| <i>Non-invasive ventilation, n (%)</i>           | 42 (8)           | 38 (8)        | 67 (16)       | 147 (11)                  | 22 (12)       | 0.9         |
| <i>Invasive ventilation, n (%)</i>               | 5 (1)            | 5 (1)         | 7 (1.6)       | 17 (1.2)                  | 3 (1.7)       | 0.6         |
| <i>Extracorporeal circulation, n (%)</i>         | 2 (0.4)          | 0 (0)         | 2 (0.4)       | 4 (0.2)                   | 0 (0)         | 0.4         |

\*P-value for the comparison between pre-COVID aggregated data and COVID data using chi-square test for categorical variables and Mann-Whitney test for continuous variables.

**Table 2.** Results of the PCR performed in nasopharyngeal swabs for virus identification in the infants hospitalised in paediatric general wards for acute bronchiolitis between 2017 and 2021

|                                     | Pre-COVID         |                   |                   | 2017-2020<br>aggregated<br>data | Post-<br>COVID    | P-<br>value*     |
|-------------------------------------|-------------------|-------------------|-------------------|---------------------------------|-------------------|------------------|
|                                     | 2017-2018         | 2018-2019         | 2019-2020         |                                 | 2020-2021         |                  |
| <b>Number of infants, n</b>         | <b>479</b>        | <b>451</b>        | <b>417</b>        | <b>1347</b>                     | <b>205</b>        |                  |
| <b>Nasal PCR<sup>s</sup>, n (%)</b> | <b>245 (51.1)</b> | <b>274 (60.7)</b> | <b>281 (67.4)</b> | <b>800 (59.4)</b>               | <b>167 (74.2)</b> | <b>&lt; 0.01</b> |
| <i>Respiratory syncytial virus</i>  | 193 (78)          | 202 (73)          | 211 (75)          | 606 (75)                        | 120 (71)          | 0.3              |
| <i>Rhinovirus</i>                   | 41 (17)           | 65 (24)           | 63 (22)           | 169 (12)                        | 44 (21)           | 0.1              |
| <i>Adenovirus</i>                   | 17 (7)            | 10 (4)            | 14 (5)            | 16 (11)                         | 12 (7)            | 0.3              |
| <i>Metapneumovirus</i>              | 17 (7)            | 10 (4)            | 10 (4)            | 37 (2.7)                        | 19 (11)           | <b>0.001</b>     |
| <i>Influenzae A</i>                 | 0 (0)             | 2 (0.4)           | 1 (0.2)           | 3 (0.2)                         | 0 (0)             | 0.4              |
| <i>Influenzae B</i>                 | 0 (0)             | 2 (0.7)           | 1 (0.3)           | 3 (0.2)                         | 0 (0)             | 0.4              |
| <i>Parainfluenzae 3</i>             | 9 (4)             | 6 (2)             | 10 (4)            | 27 (2)                          | 16 (10)           | <b>&lt; 0.01</b> |
| <i>Bocavirus</i>                    | 6 (2)             | 11 (4)            | 7 (2)             | 24 (1.7)                        | 14 (8)            | <b>0.001</b>     |
| <i>SARS CoV-2</i>                   | 0 (0)             | 0 (0)             | 0 (0)             | 0 (0)                           | 3 (2)             | <b>0.02</b>      |
| <i>Coronavirus NL63</i>             | 2 (0.8)           | 5 (2)             | 3 (1)             | 10 (0.7)                        | 9 (5)             | <b>&lt; 0.01</b> |
| <i>Coronavirus OC43</i>             | 0 (0)             | 1 (0.3)           | 2 (0.7)           | 3 (0.2)                         | 7 (4)             | <b>&lt; 0.01</b> |
| <b>No PCR, n (%)</b>                | <b>234 (48.8)</b> | <b>177 (39)</b>   | <b>136 (32)</b>   | <b>547 (40)</b>                 | <b>38 (18)</b>    | <b>&lt; 0.01</b> |

\*P-value for the comparison between pre-COVID aggregated data and COVID data using chi-square test. <sup>s</sup>Virus identifications by PCR in nasopharyngeal swabs or aspirates were performed by means of Allplex Respiratory Panel Assays (Seegene) and/or Simplexa™ Flu A/B & RSV Direct Gen II Kit (Diasorin Molecular).

1  
2  
3  
4  
5  
6  
7  
8  
9  
10  
11  
12  
13  
14  
15  
16  
17  
18  
19  
20  
21  
22  
23  
24  
25  
26  
27  
28  
29  
30  
31  
32  
33  
34  
35  
36  
37  
38  
39  
40  
41  
42  
43  
44  
45  
46

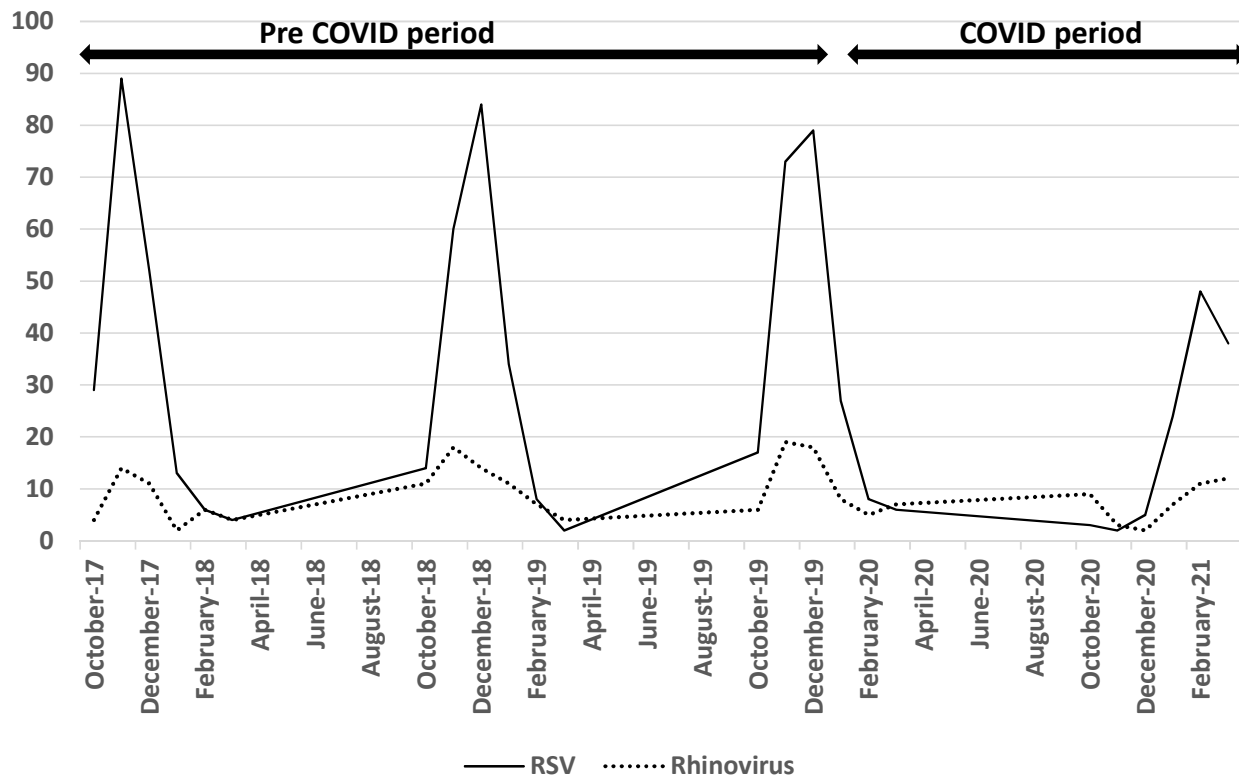

# BMJ Open

## Retrospective observational study of the influence of the COVID outbreak on infants' hospitalisation for acute bronchiolitis

|                                 |                                                                                                                                                                                                                                                                                                                                                                                                                                                                                                                                                                                                                                                                                                                                                                                    |
|---------------------------------|------------------------------------------------------------------------------------------------------------------------------------------------------------------------------------------------------------------------------------------------------------------------------------------------------------------------------------------------------------------------------------------------------------------------------------------------------------------------------------------------------------------------------------------------------------------------------------------------------------------------------------------------------------------------------------------------------------------------------------------------------------------------------------|
| Journal:                        | <i>BMJ Open</i>                                                                                                                                                                                                                                                                                                                                                                                                                                                                                                                                                                                                                                                                                                                                                                    |
| Manuscript ID                   | bmjopen-2021-059626.R2                                                                                                                                                                                                                                                                                                                                                                                                                                                                                                                                                                                                                                                                                                                                                             |
| Article Type:                   | Original research                                                                                                                                                                                                                                                                                                                                                                                                                                                                                                                                                                                                                                                                                                                                                                  |
| Date Submitted by the Author:   | 23-Aug-2022                                                                                                                                                                                                                                                                                                                                                                                                                                                                                                                                                                                                                                                                                                                                                                        |
| Complete List of Authors:       | Berdah, Laura; Armand-Trousseau Childrens Hospital, Pediatric Pulmonology<br>Romain, Anne-Sophie; Armand-Trousseau Childrens Hospital, General Pediatrics<br>Rivière, Simon; Assistance Publique - Hopitaux de Paris, Pediatric Emergency Department<br>Schnuriger, Aurélie; Armand-Trousseau Childrens Hospital, Department of Virology<br>Perrier, Marine; AP-HP, Virology Department<br>Carbajal, Ricardo; Hopital Armand-Trousseau, Emergency department<br>Lorrot, Mathie; Armand-Trousseau Childrens Hospital, General Pediatrics<br>Guedj, Romain; Assistance Publique - Hopitaux de Paris, Emergency department Armand Trousseau Hospital<br>Corvol, Harriet; Assistance Publique - Hopitaux de Paris, Pediatric Pulmonology Department; Centre de Recherche Saint Antoine |
| <b>Primary Subject Heading</b>: | Paediatrics                                                                                                                                                                                                                                                                                                                                                                                                                                                                                                                                                                                                                                                                                                                                                                        |
| Secondary Subject Heading:      | Infectious diseases                                                                                                                                                                                                                                                                                                                                                                                                                                                                                                                                                                                                                                                                                                                                                                |
| Keywords:                       | COVID-19, Community child health < PAEDIATRICS, Respiratory infections < THORACIC MEDICINE                                                                                                                                                                                                                                                                                                                                                                                                                                                                                                                                                                                                                                                                                         |
|                                 |                                                                                                                                                                                                                                                                                                                                                                                                                                                                                                                                                                                                                                                                                                                                                                                    |

SCHOLARONE™  
Manuscripts



I, the Submitting Author has the right to grant and does grant on behalf of all authors of the Work (as defined in the below author licence), an exclusive licence and/or a non-exclusive licence for contributions from authors who are: i) UK Crown employees; ii) where BMJ has agreed a CC-BY licence shall apply, and/or iii) in accordance with the terms applicable for US Federal Government officers or employees acting as part of their official duties; on a worldwide, perpetual, irrevocable, royalty-free basis to BMJ Publishing Group Ltd ("BMJ") its licensees and where the relevant Journal is co-owned by BMJ to the co-owners of the Journal, to publish the Work in this journal and any other BMJ products and to exploit all rights, as set out in our [licence](#).

The Submitting Author accepts and understands that any supply made under these terms is made by BMJ to the Submitting Author unless you are acting as an employee on behalf of your employer or a postgraduate student of an affiliated institution which is paying any applicable article publishing charge ("APC") for Open Access articles. Where the Submitting Author wishes to make the Work available on an Open Access basis (and intends to pay the relevant APC), the terms of reuse of such Open Access shall be governed by a Creative Commons licence – details of these licences and which [Creative Commons](#) licence will apply to this Work are set out in our licence referred to above.

Other than as permitted in any relevant BMJ Author's Self Archiving Policies, I confirm this Work has not been accepted for publication elsewhere, is not being considered for publication elsewhere and does not duplicate material already published. I confirm all authors consent to publication of this Work and authorise the granting of this licence.

1  
2  
3 **Retrospective observational study of the influence of the COVID outbreak on infants'**  
4  
5 **hospitalisation for acute bronchiolitis**  
6  
7

8 Laura Berdah<sup>1,2</sup>, Anne-Sophie Romain<sup>3</sup>, Simon Riviere<sup>4</sup>, Aurélie Schnuriger<sup>2,5</sup>, Marine  
9 Perrier<sup>5</sup>, Ricardo Carbajal<sup>4</sup>, Mathie Lorrot<sup>3,6</sup>, Romain Guedj<sup>4</sup>, Harriet Corvol<sup>1,2</sup>  
10  
11  
12  
13

14 **Affiliations**

- 15  
16  
17 1. Paediatric Pulmonology Department, Trousseau Hospital, Assistance Publique - Hôpitaux de  
18 Paris (AP-HP), Paris, France;  
19  
20 2. Sorbonne Université, Centre de Recherche Saint-Antoine (CRSA), Inserm UMR\_S938,  
21 Paris, France;  
22  
23 3. Department of General Paediatrics, Trousseau Hospital, AP-HP, Sorbonne Université, Paris,  
24 France;  
25  
26 4. Paediatric Emergency Department, Hôpital Trousseau, APHP, Sorbonne Université, Paris,  
27 France;  
28  
29 5. Virology Department, Trousseau Hospital, AP-HP, Paris, France;  
30  
31 6. Eceve, UMR\_S1123, Paris, France.  
32  
33  
34  
35  
36  
37  
38  
39  
40  
41

42 **Address correspondence to:** Harriet Corvol,  
43  
44 Paediatric Pulmonology Department, Trousseau Hospital,  
45  
46 26 avenue du Dr Netter, 75012 Paris, France  
47  
48 harriet.corvol@aphp.fr, Tel: +331-71-73-82-90.  
49  
50  
51  
52

53 **Word count:** 2158

54  
55  
56 **Key words:** infant, acute bronchiolitis, COVID-19, SARS-CoV-2, RSV, acute lower  
57  
58 respiratory infection.  
59  
60

## Abstract

**Objectives.** Acute bronchiolitis is a major public health issue with high number of infants hospitalised worldwide each year. In France, hospitalisations mostly occur between October and March, and peak in December. A reduction of emergency visits for bronchiolitis has been observed at onset of the COVID outbreak. We aimed to assess the pandemic effects on the hospitalisations for bronchiolitis during the 2020-2021 winter (COVID-period) compared to 3 previous winters (pre-COVID).

**Design.** Retrospective, observational and cross-sectional study.

**Setting.** Tertiary university paediatric hospital in Paris (France).

**Participants.** All infants aged under 12-months who were hospitalised for acute bronchiolitis during the autumn/winter seasons (October 1-March 31) from 2017 to 2021 were included. Clinical and laboratory data were collected using standardized forms.

**Results.** During the COVID-period was observed a 54.3% reduction in hospitalisations for bronchiolitis associated with a delayed peak (February instead of November-December). Clinical characteristics and hospitalisation courses were substantially similar. The differences during the COVID period were: smaller proportion of infants with comorbidities (14% vs 8%  $p = 0.02$ ), lower need for oxygen (45% vs 55%,  $p = 0.01$ ), higher proportions of Metapneumovirus, Parainfluenzae 3, Bocavirus, Coronavirus NL63 and OC43 (all  $p \leq 0.01$ ), and no Influenza. The three infants positive for SARS-CoV-2 were also positive for RSV, suggesting that SARS-CoV-2 alone does not cause bronchiolitis, despite previous assumptions.

**Conclusion.** The dramatic reduction in infants' hospitalisations for acute bronchiolitis is an opportunity to change our future habits such as advising the population to wear masks and apply additional hygiene measures in case of respiratory tract infections. This may change the worldwide bronchiolitis burden and improve children respiratory outcomes.

1  
2  
3 **Data availability statement:** Data are available upon reasonable request.  
4  
5  
6  
7

8 **Strengths and limitations of this study**  
9

- 10  
11 • The vast majority of infants admitted to our paediatric hospital between 2017 and 2021  
12 for acute bronchiolitis in their first year after birth will have been identified.  
13  
14  
15  
16 • The clinical and viral characteristics of these infants hospitalised during the COVID-  
17 epidemic season 2020-2021 were compared to those of 3 previous winters.  
18  
19  
20  
21  
22 • Three physicians independently reviewed the medical records to collect clinical data  
23 and laboratory tests results using a standardized specific form.  
24  
25  
26  
27  
28  
29  
30  
31  
32  
33  
34  
35  
36  
37  
38  
39  
40  
41  
42  
43  
44  
45  
46  
47  
48  
49  
50  
51  
52  
53  
54  
55  
56  
57  
58  
59  
60



## Introduction

In autumn and winter in the northern hemisphere, community medicine (paediatricians and general practitioners), as well as emergency and general paediatric departments, are usually overwhelmed by children, especially infants, with acute bronchiolitis (1, 2). Hospital paediatric inpatient departments have to reorganize every winter to handle the high number of infants with this acute lower respiratory infection (ALRI), mostly due to the respiratory syncytial virus (RSV) (1-5). Neonates and young infants often require hospitalisation in general wards, and some even require intensive care unit (ICU) care (2, 6). Moreover, RSV is the third leading cause of death in children aged below 5 years (from ALRI, after pneumonia), secondary to *Streptococcus pneumoniae* and *Haemophilus influenzae* type b (2). Acute bronchiolitis is thus a yearly worldwide public health issue. In France, similar epidemic patterns are seen each year with a large majority of hospitalisations between October and March, with a peak in December (7). Management is largely supportive, focusing on maintaining oxygenation and hydration.

The emergence of the coronavirus disease 2019 (COVID-19) pandemic and the global public health responses related to this pandemic have influenced the viruses' epidemiology. A striking reduction of admission for ALRIs in paediatric ICUs was observed during the winter 2020 in the southern hemisphere (8). In France, collective measures to contain the pandemic have been implemented since mid-March 2020, namely lockdowns, curfews, social distancing, requirement of masks, strict hand hygiene, and restriction of commerce activities. We observed a reduction in the visits to the paediatric emergency department of our hospital for bronchiolitis in the autumn 2020 (9). Here, we aimed to assess the effects of the COVID-19 pandemic on the clinical and viral characteristics of infants hospitalised for bronchiolitis during the epidemic season 2020-2021 (COVID period) compared to previous winters (pre-COVID period).

## Methods

### Study design and patients

This retrospective, observational and cross-sectional study was conducted in the Paediatric University Hospital Armand Trousseau, Assistance Publique Hôpitaux de Paris (APHP), in Paris (France). All infants aged less than 12 months, hospitalised for a first episode of acute bronchiolitis during the autumn/winter seasons (October 1 to March 31) from 2017 to 2021 (*i.e.*, 2017-2018; 2018-2019; 2019-2020; and 2020-2021) were included. Exclusion criteria were age over 12 months, a second episode (or more) of bronchiolitis, and/or an asthma attack. These exclusion criteria were chosen based on the French National Guidelines for bronchiolitis (10). The study was approved by the Institutional Review Board of the French Society for Respiratory Medicine (*Société de Pneumologie de Langue Française*, #CEPRO\_2020-080). In accordance with French laws for observational studies, the requirement for written informed consent was waived (study BronChioVID N°20201119185601).

Patient's selection was performed using the ICD10 code diagnoses of bronchiolitis (J21.0, J21.1, J21.8, and J21.9). Three physicians reviewed the medical records to collect demographic and clinical data as well as laboratory tests results using a standardized specific form. The demographic data collected comprised date of birth, gender and underlying conditions such as prematurity, bronchopulmonary dysplasia, intrauterine growth retardation, congenital heart disease, sickle cell disease, and genetic disease. The clinical data collected at the time of the bronchiolitis episode included date, age, weight, results of the PCR in nasopharyngeal swabs or aspirates for virus identification (Allplex™ Respiratory Panel Assays [Seegene], and/or Simplexa™ Flu A/B & RSV Direct Gen II Kit [Diasorin Molecular]), and medical evolution with duration of the hospitalisation, hospitalisation in ICU, respiratory support

1  
2  
3 (oxygen therapy, high-flow nasal cannula oxygen therapy, non-invasive ventilation, invasive  
4 ventilation, and extracorporeal membrane oxygenation [ECMO]), and nutritional support.  
5  
6  
7  
8  
9

### 10 **Statistical analysis**

11  
12 The normality of the distribution for continuous variables was tested using the Shapiro-  
13 wilk test and was rejected for each variable. Patients' characteristics were described as medians  
14 with interquartile range for continuous variables and percentages for categorical variables. We  
15 compared the patients' characteristics between the pre-COVID periods, defined as October 1  
16 to March 31 2017-2018, 2018-2019, and 2019-2020, with those of the COVID period, defined  
17 as October 1, 2020 to March 31, 2021, by using a chi-square test for categorical variables and  
18 a Mann-Whitney test for continuous variables. The analyses were performed using STATA  
19 14.2.  
20  
21  
22  
23  
24  
25  
26  
27  
28  
29  
30  
31  
32

### 33 **Patient and Public Involvement**

34  
35 Patients or the public were not involved in the design, or conduct, or reporting, or  
36 dissemination plans of our research.  
37  
38  
39  
40  
41  
42  
43  
44  
45  
46  
47  
48  
49  
50  
51  
52  
53  
54  
55  
56  
57  
58  
59  
60

## Results

### Number of hospitalisations

Over the pre-COVID period, 1,347 infants were hospitalised for bronchiolitis in our hospital, with a mean of 449 infants per winter, compared to 205 infants during the COVID period; which corresponds to a 54.3% reduction in the number of hospitalisations (**Table 1**). As shown in **Figure 1**, the bronchiolitis outbreak was delayed during the COVID period, with a peak in the hospitalisations in February, compared to the usual peaks in November-December during the pre-COVID periods.

### Characteristics of the patients

The clinical characteristics of the infants hospitalised for bronchiolitis are shown in **Table 1**. The age distribution and the sex ratio were not significantly different between the pre-COVID and the COVID periods ( $p = 0.7$  and  $0.5$  respectively). During the pre-COVID periods, 14% of the infants presented with comorbidities (with 11% of preterm), whereas only 8% had comorbidities during the COVID period, ( $p = 0.02$ ).

The number of infants who received oxygen therapy was significantly lower during the COVID period than during the pre-COVID period (45% vs 55% respectively,  $p = 0.01$ ). There were no significant differences between the pre-COVID and the COVID periods regarding the length of hospitalisation ( $p = 0.3$ ), the number of patients transferred to a paediatric ICU ( $p = 0.6$ ), and the need for non-invasive ( $p = 0.9$ ) or invasive ventilation ( $p = 0.6$ ).

### Viral epidemiology

PCR in nasopharyngeal swabs for virus identification were performed increasingly across the years ( $p < 0.01$ ) (**Table 2**). RSV remains the most common virus found (74%), followed by Rhinovirus and Adenovirus (**Table 2**). The RSV outbreak was significantly

1  
2  
3 delayed during the COVID period compared to the previous winters, with a plateau between  
4  
5 January and March 2021, compared to peaks in November-December during the pre-COVID  
6  
7 periods (**Figure 1**).  
8  
9

10 The proportion of the following viruses was significantly higher during the COVID  
11 period than during the pre-COVID period: Metapneumovirus ( $p = 0.001$ ), Parainfluenzae 3 ( $p$   
12  $< 0.01$ ), Bocavirus ( $p = 0.001$ ), Coronavirus OC43 ( $p < 0.01$ ) and NL63 ( $p < 0.01$ ) (**Table 2**).  
13  
14 No Influenza (A and B) was found during the COVID period. Only 3 infants with bronchiolitis  
15  
16 had a PCR positive for SARS-CoV-2 in nasopharyngeal swabs during the COVID period, but  
17  
18 all 3 were also positive for RSV.  
19  
20  
21  
22  
23  
24  
25  
26  
27  
28  
29  
30  
31  
32  
33  
34  
35  
36  
37  
38  
39  
40  
41  
42  
43  
44  
45  
46  
47  
48  
49  
50  
51  
52  
53  
54  
55  
56  
57  
58  
59  
60

## Discussion

This study highlights the dramatic reduction in the number of infants who required a hospitalisation for acute bronchiolitis during the COVID-19 outbreak compared to the three previous years. The outbreak of acute bronchiolitis was not only smaller, but also delayed by several weeks. The clinical characteristics of the infants hospitalised for acute bronchiolitis as well as the hospitalisation courses were substantially similar during pre-COVID and COVID periods. While the proportions of RSV and Rhinovirus were similar between both periods, those of Metapneumovirus, Parainfluenzae 3, Bocavirus, Coronavirus NL63 and Coronavirus OC43 increased during the COVID pandemic. Interestingly, during the COVID period, no Influenza was found and the only 3 infants with a PCR positive for SARS-CoV-2 were also positive for RSV, suggesting that SARS-CoV-2 alone does not cause bronchiolitis.

This winter, we observed a strong decrease in the number of hospitalisations for acute bronchiolitis. This observation is consistent with data first from the southern hemisphere, Australia and South America (11, 12), and, more recently, from Europe and North-America (9, 13-16). Several studies reported reductions in the rate of admission to paediatric emergency departments for acute bronchiolitis during the COVID-19 outbreak (9, 14). Results similar to ours were reported in Belgium with a dramatic decrease in bronchiolitis hospitalisations and very limited RSV positive as compared to the last three years (16). Two recent studies also suggest that social distancing and other lockdown strategies are effective in slowing down the spreading of respiratory diseases and decreasing the need for hospitalisation among children (13, 15). Indeed, after reaching France on January 2020, a major progression of COVID-19 led to public health prevention interventions. The first national lockdown officially started on March 17, 2020 and ended on May 10, 2020. Masks had to be worn by persons 11 years of age and older in enclosed public places as of July 20, 2020. As shown in this study, the number of hospitalisations for acute bronchiolitis has therefore drastically decreased, even while schools

1  
2  
3 and nurseries have remained open during winter. A recent publication shows the extent to which  
4 transmission of common paediatric infections can be altered when close contact with other  
5 children is eliminated (17). However, in our study, infants hospitalised for acute bronchiolitis  
6 had a mean age of 3.5 months, so a majority of these infants were not yet in collective nurseries,  
7 but were at home with their mothers (who were on maternity leave). Moreover, since September  
8 2020, professionals in nurseries are required to wear a mask in the presence of children. It can  
9 therefore be suggested that the RSV transmission to these young children can also occur through  
10 their parents or older siblings. Intriguingly, we observed a lower proportion of infants with  
11 comorbidities hospitalised during the COVID period. This could be due to the fact that parents  
12 have protected these at-risk children much more for fear that they would develop severe  
13 infections during the pandemic period.  
14  
15  
16  
17  
18  
19  
20  
21  
22  
23  
24  
25  
26  
27

28 The outbreak of acute bronchiolitis was not only lower, but was also delayed by several  
29 weeks. Besides, RSV emerged in January, after the Christmas break. One explanation might be  
30 that families got together during this celebration break, and social distancing measures might  
31 have been followed less strictly. Interestingly, we observed that while the proportions of RSV  
32 and Rhinovirus were similar to that of previous years during the COVID-19 period, those of  
33 Parainfluenzae 3, Bocavirus, Coronavirus NL63 and Coronavirus OC43 were higher. Our  
34 results on the prevalence of the various respiratory viruses during the pre-COVID period are in  
35 agreement with the literature (18). Moreover, during the COVID period, no Influenza was  
36 found, suggestive that this virus is sensitive to the hygiene measures adopted during the  
37 pandemic. A recent epidemiological study on common communicable diseases in the general  
38 population in France during the COVID pandemic also showed that patients who presented  
39 with ALRI symptoms and underwent a PCR test were most likely infected by Influenza in 2019,  
40 but by SARS-CoV-2 or Metapneumovirus in 2020 (19). Moreover, in contradiction to  
41 assumptions made at the pandemic onset, our data suggest that SARS-CoV-2 alone does not  
42  
43  
44  
45  
46  
47  
48  
49  
50  
51  
52  
53  
54  
55  
56  
57  
58  
59  
60

1  
2  
3 cause bronchiolitis, as the only 3 infants SARS-CoV-2 positive were also positive for RSV. It  
4  
5 will be important to confirm these results in the future, especially if SARS-CoV-2 remains  
6  
7 endemic in the years to come.  
8  
9

10 The high impact of bronchiolitis in terms of cost of hospitalisation is not insignificant.  
11  
12 In Italy, a recent study showed that the main cost item is related to young infants, in particular,  
13  
14 those below 3 months of age, and RSV continues to be the main causative agent of severe  
15  
16 bronchiolitis (20). The authors highlight that new vaccination strategies, such as the extension  
17  
18 of immunoprophylaxis to infants is essential. Therefore, it would be useful, after the COVID-  
19  
20 19 pandemic, for adults to continue to wear masks and wash their hands regularly to mitigate  
21  
22 the risk of transmission of respiratory infection to young children. Acute severe RSV  
23  
24 bronchiolitis in early childhood is associated with long-term morbidities including recurrent  
25  
26 wheezing, asthma, and lower lung function in later life (21). Therefore, the decrease in the  
27  
28 number of severe bronchiolitis cases due to RSV or other viruses might not only have financial  
29  
30 consequences, but also impact the long-term respiratory outcome of children.  
31  
32  
33

34  
35 We are aware of some limitations of our study. The decrease in the number of  
36  
37 hospitalisations may have been partly the consequence of a decrease in the overall number of  
38  
39 emergency room visits since the start of the COVID-19 pandemic. However, it is likely that,  
40  
41 despite the COVID-19 pandemic, children with the most severe respiratory distress were still  
42  
43 seen in the emergency room. In the UK, a significant reduction of non-urgent health care  
44  
45 demands were observed during the pandemic and were associated with an increase in severe  
46  
47 or urgent cases (22).  
48  
49

50  
51 In conclusion, our work provides an overview of the infants' hospitalisations for acute  
52  
53 bronchiolitis during the COVID period in the winter of 2020-2021. This dramatic reduction in  
54  
55 infants' hospitalizations constitutes a great opportunity to change our habits for future autumn  
56  
57 and winter seasons by advising people, especially adults, to wear masks and increase social  
58  
59  
60



1  
2  
3 distancing and hygiene measures in case of upper and lower respiratory tract infections. This  
4  
5 may drastically change the worldwide burden of bronchiolitis and hospitalisations caused by  
6  
7 RSV in the future, as well have important implications for patient outcomes and prevalence of  
8  
9 asthma in children (23). The scientific community should nevertheless keep close surveillance  
10  
11 of RSV epidemics since, as underlined by Di Mattia et al., the increase of an immunologically  
12  
13 naïve population with infants born from mothers who have not reinforced their immunity to  
14  
15 RSV, could lead to greater epidemics in the next winters (24).  
16  
17  
18  
19  
20  
21  
22  
23  
24  
25  
26  
27  
28  
29  
30  
31  
32  
33  
34  
35  
36  
37  
38  
39  
40  
41  
42  
43  
44  
45  
46  
47  
48  
49  
50  
51  
52  
53  
54  
55  
56  
57  
58  
59  
60

For peer review only

## Acknowledgements

The authors would like to thank the medical and nursing staff of the paediatric pulmonology, general paediatric and paediatric emergency departments at Trousseau Hospital, Assistance Publique - Hôpitaux de Paris (AP-HP), Sorbonne Université, Paris, France.

**Contributors:** LB and HC conceptualized and designed the study, collected the data, drafted the initial manuscript, and reviewed and revised the manuscript. RG designed the data collection, collected data, carried out the statistical analyses, and reviewed and revised the manuscript. ASR, SR, AS, MP, ML, RC participated in the study conceptualization and data collection. They also reviewed and revised the manuscript. All authors approved the final manuscript as submitted and agree to be accountable for all aspects of the work.

**Competing Interests:** The authors have no conflicts of interest to disclose.

**Funding:** No funding was secured for this study.

**Conflict of Interest Disclosures:** The authors have no conflicts of interest to disclose.

1  
2  
3 **Figure's caption**  
4  
5  
6

7 **Figure 1.** Evolution of the number of RSV and Rhinovirus cases during the pre-COVID period  
8 (between 2017 and 2020) and the COVID period (2020-2021)  
9  
10  
11  
12  
13  
14  
15  
16  
17  
18  
19  
20  
21  
22  
23  
24  
25  
26  
27  
28  
29  
30  
31  
32  
33  
34  
35  
36  
37  
38  
39  
40  
41  
42  
43  
44  
45  
46  
47  
48  
49  
50  
51  
52  
53  
54  
55  
56  
57  
58  
59  
60

For peer review only

## References

1. Florin TA, Plint AC, Zorc JJ. Viral bronchiolitis. *Lancet*. 2017;389(10065):211-24.
2. Nair H, Nokes DJ, Gessner BD, Dherani M, Madhi SA, Singleton RJ, et al. Global burden of acute lower respiratory infections due to respiratory syncytial virus in young children: a systematic review and meta-analysis. *Lancet*. 2010;375(9725):1545-55.
3. Wright M, Piedimonte G. Respiratory syncytial virus prevention and therapy: past, present, and future. *Pediatr Pulmonol*. 2011;46(4):324-47.
4. Bont L, Checchia PA, Fauroux B, Figueras-Aloy J, Manzoni P, Paes B, et al. Defining the Epidemiology and Burden of Severe Respiratory Syncytial Virus Infection Among Infants and Children in Western Countries. *Infect Dis Ther*. 2016;5(3):271-98.
5. Obando-Pacheco P, Justicia-Grande AJ, Rivero-Calle I, Rodriguez-Tenreiro C, Sly P, Ramilo O, et al. Respiratory Syncytial Virus Seasonality: A Global Overview. *J Infect Dis*. 2018;217(9):1356-64.
6. Nair H, Simoes EA, Rudan I, Gessner BD, Azziz-Baumgartner E, Zhang JSF, et al. Global and regional burden of hospital admissions for severe acute lower respiratory infections in young children in 2010: a systematic analysis. *Lancet*. 2013;381(9875):1380-90.
7. Che D, Nicolau J, Bergounioux J, Perez T, Bitar D. [Bronchiolitis among infants under 1 year of age in France: epidemiology and factors associated with mortality]. *Arch Pediatr*. 2012;19(7):700-6.
8. Vasquez-Hoyos P, Diaz-Rubio F, Monteverde-Fernandez N, Jaramillo-Bustamante JC, Carvajal C, Serra A, et al. Reduced PICU respiratory admissions during COVID-19. *Arch Dis Child*. 2020.
9. Guedj R, Lorrot M, Lecarpentier T, Leger PL, Corvol H, Carbajal R. Infant bronchiolitis dramatically reduced during the second French COVID-19 outbreak. *Acta Paediatr*. 2021;110(4):1297-9.

- 1  
2  
3 10. Prise en charge du 1er épisode de bronchiolite aiguë chez le nourrisson de moins de 12  
4 mois. Recommandations pour la pratique clinique. Available at [https://www.has-](https://www.has-sante.fr/upload/docs/application/pdf/2019-11/hascnpp_bronchiolite_texte_recommandations_2019.pdf)  
5 [sante.fr/upload/docs/application/pdf/2019-](https://www.has-sante.fr/upload/docs/application/pdf/2019-11/hascnpp_bronchiolite_texte_recommandations_2019.pdf)  
6 [11/hascnpp\\_bronchiolite\\_texte\\_recommandations\\_2019.pdf](https://www.has-sante.fr/upload/docs/application/pdf/2019-11/hascnpp_bronchiolite_texte_recommandations_2019.pdf).  
7  
8  
9
- 10  
11  
12 11. Britton PN, Hu N, Saravanos G, Shrapnel J, Davis J, Snelling T, et al. COVID-19 public  
13 health measures and respiratory syncytial virus. *Lancet Child Adolesc Health*. 2020;4(11):e42-  
14 e3.  
15  
16  
17
- 18  
19 12. Nascimento MS, Baggio DM, Fascina LP, do Prado C. Impact of social isolation due to  
20 COVID-19 on the seasonality of pediatric respiratory diseases. *PLoS One*.  
21 2020;15(12):e0243694.  
22  
23  
24
- 25  
26 13. Angoulvant F, Ouldali N, Yang DD, Filser M, Gajdos V, Rybak A, et al. COVID-19  
27 pandemic: Impact caused by school closure and national lockdown on pediatric visits and  
28 admissions for viral and non-viral infections, a time series analysis. *Clin Infect Dis*. 2020.  
29  
30  
31
- 32  
33 14. Curatola A, Lazzareschi I, Bersani G, Covino M, Gatto A, Chiaretti A. Impact of  
34 COVID-19 outbreak in acute bronchiolitis: Lesson from a tertiary Italian Emergency  
35 Department. *Pediatr Pulmonol*. 2021;56(8):2484-8.  
36  
37  
38
- 39  
40 15. Hatoun J, Correa ET, Donahue SMA, Vernacchio L. Social Distancing for COVID-19  
41 and Diagnoses of Other Infectious Diseases in Children. *Pediatrics*. 2020;146(4).  
42  
43  
44
- 45  
46 16. Van Brusselen D, De Troeyer K, Ter Haar E, Vander Auwera A, Poschet K, Van Nuijs  
47 S, et al. Bronchiolitis in COVID-19 times: a nearly absent disease? *Eur J Pediatr*.  
48 2021;180(6):1969-73.  
49  
50
- 51  
52 17. Sakamoto H, Ishikane M, Ueda P. Seasonal Influenza Activity During the SARS-CoV-2  
53 Outbreak in Japan. *JAMA*. 2020;323(19):1969-71.  
54  
55
- 56  
57 18. Kenmoe S, Kengne-Nde C, Ebogo-Belobo JT, Mbaga DS, Fatawou Modiyinji A,  
58 Njouom R. Systematic review and meta-analysis of the prevalence of common respiratory  
59  
60

1  
2  
3 viruses in children < 2 years with bronchiolitis in the pre-COVID-19 pandemic era. PLoS One.  
4  
5 2020;15(11):e0242302.  
6

7  
8 19. Launay T, Souty C, Vilcu AM, Turbelin C, Blanchon T, Guerrisi C, et al. Common  
9  
10 communicable diseases in the general population in France during the COVID-19 pandemic.  
11  
12 PLoS One. 2021;16(10):e0258391.  
13

14  
15 20. Bozzola E, Ciarlito C, Guolo S, Brusco C, Cerone G, Antilici L, et al. Respiratory  
16  
17 Syncytial Virus Bronchiolitis in Infancy: The Acute Hospitalization Cost. Front Pediatr.  
18  
19 2020;8:594898.  
20

21  
22 21. Kitcharoensakkul M, Bacharier LB, Schweiger TL, Wilson B, Goss CW, Lew D, et al.  
23  
24 Lung function trajectories and bronchial hyperresponsiveness during childhood following  
25  
26 severe RSV bronchiolitis in infancy. *Pediatr Allergy Immunol.* 2021;32(3):457-64.  
27

28  
29 22. Valitutti F, Zenzeri L, Mauro A, Pacifico R, Borrelli M, Muzzica S, et al. Effect of  
30  
31 Population Lockdown on Pediatric Emergency Room Demands in the Era of COVID-19. *Front*  
32  
33 *Pediatr.* 2020;8:521.  
34

35  
36 23. Shi T, McAllister DA, O'Brien KL, Simoes EAF, Madhi SA, Gessner BD, et al. Global,  
37  
38 regional, and national disease burden estimates of acute lower respiratory infections due to  
39  
40 respiratory syncytial virus in young children in 2015: a systematic review and modelling study.  
41  
42 *Lancet.* 2017;390(10098):946-58.  
43

44  
45 24. Di Mattia G, Nenna R, Mancino E, Rizzo V, Pierangeli A, Villani A, et al. During the  
46  
47 COVID-19 pandemic where has respiratory syncytial virus gone? *Pediatr Pulmonol.*  
48  
49 2021;56(10):3106-9.  
50  
51  
52  
53  
54  
55  
56  
57  
58  
59  
60

## Tables

**Table 1.** Clinical characteristics of the infants hospitalised for acute bronchiolitis in a tertiary university paediatric hospital in Paris (France) between 2017 and 2021

|                                                  | Pre-COVID period |               |               | COVID period              |               | P-value*    |
|--------------------------------------------------|------------------|---------------|---------------|---------------------------|---------------|-------------|
|                                                  | 2017-2018        | 2018-2019     | 2019-2020     | 2017-2020 aggregated data | 2020-2021     |             |
| <b>Number of infants, n</b>                      | <b>479</b>       | <b>451</b>    | <b>417</b>    | <b>1347</b>               | <b>205</b>    | -           |
| <b>Age (months): median (IQR)</b>                | 2.8 (1.5-4.9)    | 2.6 (1.4-4.8) | 2.4 (1.3-4.4) | 2.5 (1.4-4.7)             | 2.7 (1.5-4.7) | 0.7         |
| <b>Gender: boys, n (%)</b>                       | 279 (58.2)       | 249 (55.2)    | 244 (58.5)    | 772 (57)                  | 119 (58)      | 0.5         |
| <b>Comorbidities, n (%)</b>                      | 66 (14)          | 66 (15)       | 53 (13)       | 185 (14)                  | 16 (8)        | <b>0.02</b> |
| <b>Weight (kg): median (IQR)</b>                 | 5.6 (4.4-6.9)    | 5.5 (4.6-7.0) | 5.4 (4.3-7.0) | 5.5 (4.4-7.0)             | 5.7 (4.5-6.9) | 0.6         |
| <b>Evolution</b>                                 |                  |               |               |                           |               |             |
| Duration of hospitalisation (days), median (IQR) | 2.4 (1.2-4.0)    | 3.0 (2.0-4.0) | 3.9 (2.0-5.0) | 3.0 (2.0-4.9)             | 3.0 (1.5-4.2) | 0.3         |
| Oxygen therapy, n (%)                            | 259 (54)         | 237 (52)      | 257 (61)      | 753 (56)                  | 93 (45)       | <b>0.01</b> |
| Intensive Care Unit, n (%)                       | 48 (13)          | 42 (9)        | 67 (16)       | 157 (12)                  | 21 (11)       | 0.6         |
| <i>Non-invasive ventilation, n (%)</i>           | 42 (8)           | 38 (8)        | 67 (16)       | 147 (11)                  | 22 (12)       | 0.9         |
| <i>Invasive ventilation, n (%)</i>               | 5 (1)            | 5 (1)         | 7 (1.6)       | 17 (1.2)                  | 3 (1.7)       | 0.6         |
| <i>Extracorporeal circulation, n (%)</i>         | 2 (0.4)          | 0 (0)         | 2 (0.4)       | 4 (0.2)                   | 0 (0)         | 0.4         |

\*P-value for the comparison between pre-COVID aggregated data and COVID data using chi-square test for categorical variables and Mann-Whitney test for continuous variables.

**Table 2.** Results of the PCR performed in nasopharyngeal swabs for virus identification in the infants hospitalised in paediatric general wards for acute bronchiolitis between 2017 and 2021

|                                     | Pre-COVID         |                   |                   | 2017-2020<br>aggregated<br>data | Post-<br>COVID    | P-<br>value*     |
|-------------------------------------|-------------------|-------------------|-------------------|---------------------------------|-------------------|------------------|
|                                     | 2017-2018         | 2018-2019         | 2019-2020         |                                 | 2020-2021         |                  |
| <b>Number of infants, n</b>         | <b>479</b>        | <b>451</b>        | <b>417</b>        | <b>1347</b>                     | <b>205</b>        |                  |
| <b>Nasal PCR<sup>s</sup>, n (%)</b> | <b>245 (51.1)</b> | <b>274 (60.7)</b> | <b>281 (67.4)</b> | <b>800 (59.4)</b>               | <b>167 (74.2)</b> | <b>&lt; 0.01</b> |
| <i>Respiratory syncytial virus</i>  | 193 (78)          | 202 (73)          | 211 (75)          | 606 (75)                        | 120 (71)          | 0.3              |
| <i>Rhinovirus</i>                   | 41 (17)           | 65 (24)           | 63 (22)           | 169 (12)                        | 44 (21)           | 0.1              |
| <i>Adenovirus</i>                   | 17 (7)            | 10 (4)            | 14 (5)            | 16 (11)                         | 12 (7)            | 0.3              |
| <i>Metapneumovirus</i>              | 17 (7)            | 10 (4)            | 10 (4)            | 37 (2.7)                        | 19 (11)           | <b>0.001</b>     |
| <i>Influenzae A</i>                 | 0 (0)             | 2 (0.4)           | 1 (0.2)           | 3 (0.2)                         | 0 (0)             | 0.4              |
| <i>Influenzae B</i>                 | 0 (0)             | 2 (0.7)           | 1 (0.3)           | 3 (0.2)                         | 0 (0)             | 0.4              |
| <i>Parainfluenzae 3</i>             | 9 (4)             | 6 (2)             | 10 (4)            | 27 (2)                          | 16 (10)           | <b>&lt; 0.01</b> |
| <i>Bocavirus</i>                    | 6 (2)             | 11 (4)            | 7 (2)             | 24 (1.7)                        | 14 (8)            | <b>0.001</b>     |
| <i>SARS CoV-2</i>                   | 0 (0)             | 0 (0)             | 0 (0)             | 0 (0)                           | 3 (2)             | <b>0.02</b>      |
| <i>Coronavirus NL63</i>             | 2 (0.8)           | 5 (2)             | 3 (1)             | 10 (0.7)                        | 9 (5)             | <b>&lt; 0.01</b> |
| <i>Coronavirus OC43</i>             | 0 (0)             | 1 (0.3)           | 2 (0.7)           | 3 (0.2)                         | 7 (4)             | <b>&lt; 0.01</b> |
| <b>No PCR, n (%)</b>                | <b>234 (48.8)</b> | <b>177 (39)</b>   | <b>136 (32)</b>   | <b>547 (40)</b>                 | <b>38 (18)</b>    | <b>&lt; 0.01</b> |

\*P-value for the comparison between pre-COVID aggregated data and COVID data using chi-square test. <sup>s</sup>Virus identifications by PCR in nasopharyngeal swabs or aspirates were performed by means of Allplex Respiratory Panel Assays (Seegene) and/or Simplexa™ Flu A/B & RSV Direct Gen II Kit (Diasorin Molecular).



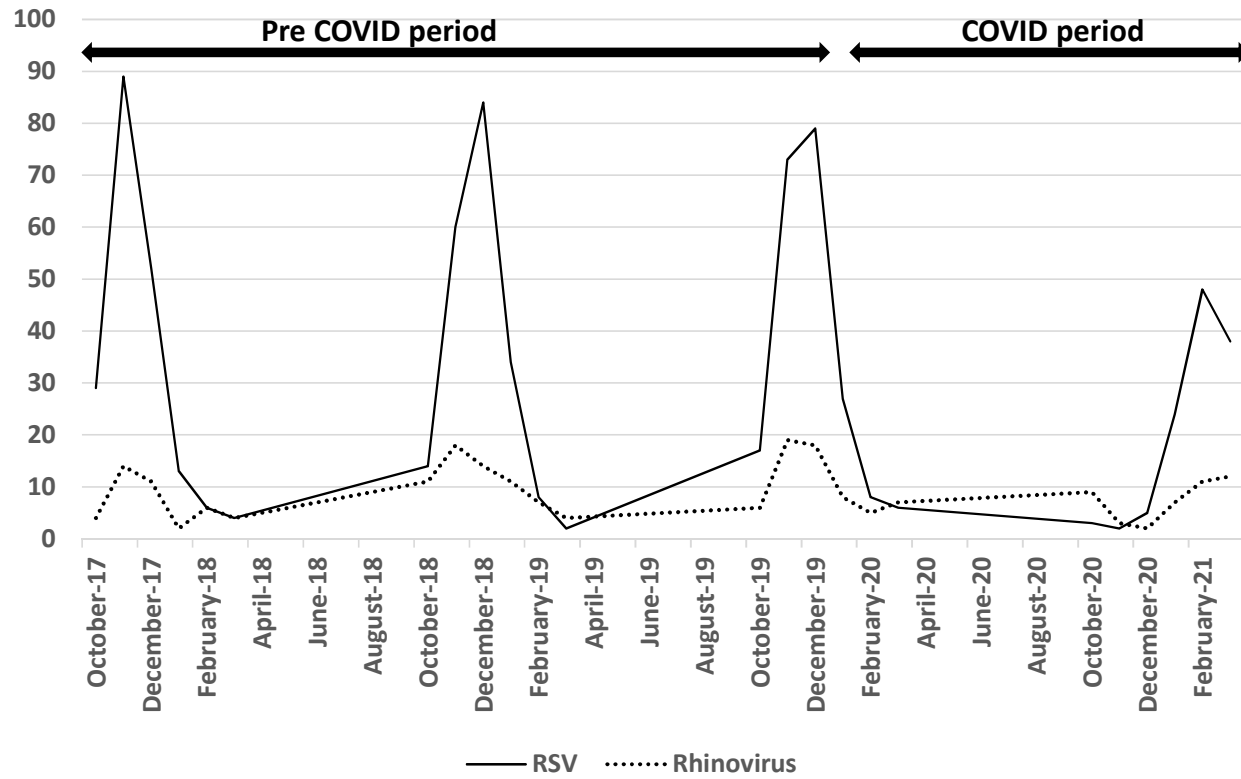

# BMJ Open

## Retrospective observational study of the influence of the COVID outbreak on infants' hospitalisation for acute bronchiolitis

|                                 |                                                                                                                                                                                                                                                                                                                                                                                                                                                                                                                                                                                                                                                                                                                                                                                    |
|---------------------------------|------------------------------------------------------------------------------------------------------------------------------------------------------------------------------------------------------------------------------------------------------------------------------------------------------------------------------------------------------------------------------------------------------------------------------------------------------------------------------------------------------------------------------------------------------------------------------------------------------------------------------------------------------------------------------------------------------------------------------------------------------------------------------------|
| Journal:                        | <i>BMJ Open</i>                                                                                                                                                                                                                                                                                                                                                                                                                                                                                                                                                                                                                                                                                                                                                                    |
| Manuscript ID                   | bmjopen-2021-059626.R3                                                                                                                                                                                                                                                                                                                                                                                                                                                                                                                                                                                                                                                                                                                                                             |
| Article Type:                   | Original research                                                                                                                                                                                                                                                                                                                                                                                                                                                                                                                                                                                                                                                                                                                                                                  |
| Date Submitted by the Author:   | 20-Sep-2022                                                                                                                                                                                                                                                                                                                                                                                                                                                                                                                                                                                                                                                                                                                                                                        |
| Complete List of Authors:       | Berdah, Laura; Armand-Trousseau Childrens Hospital, Pediatric Pulmonology<br>Romain, Anne-Sophie; Armand-Trousseau Childrens Hospital, General Pediatrics<br>Rivière, Simon; Assistance Publique - Hopitaux de Paris, Pediatric Emergency Department<br>Schnuriger, Aurélie; Armand-Trousseau Childrens Hospital, Department of Virology<br>Perrier, Marine; AP-HP, Virology Department<br>Carbajal, Ricardo; Hopital Armand-Trousseau, Emergency department<br>Lorrot, Mathie; Armand-Trousseau Childrens Hospital, General Pediatrics<br>Guedj, Romain; Assistance Publique - Hopitaux de Paris, Emergency department Armand Trousseau Hospital<br>Corvol, Harriet; Assistance Publique - Hopitaux de Paris, Pediatric Pulmonology Department; Centre de Recherche Saint Antoine |
| <b>Primary Subject Heading</b>: | Paediatrics                                                                                                                                                                                                                                                                                                                                                                                                                                                                                                                                                                                                                                                                                                                                                                        |
| Secondary Subject Heading:      | Infectious diseases                                                                                                                                                                                                                                                                                                                                                                                                                                                                                                                                                                                                                                                                                                                                                                |
| Keywords:                       | COVID-19, Community child health < PAEDIATRICS, Respiratory infections < THORACIC MEDICINE                                                                                                                                                                                                                                                                                                                                                                                                                                                                                                                                                                                                                                                                                         |
|                                 |                                                                                                                                                                                                                                                                                                                                                                                                                                                                                                                                                                                                                                                                                                                                                                                    |

SCHOLARONE™  
Manuscripts



I, the Submitting Author has the right to grant and does grant on behalf of all authors of the Work (as defined in the below author licence), an exclusive licence and/or a non-exclusive licence for contributions from authors who are: i) UK Crown employees; ii) where BMJ has agreed a CC-BY licence shall apply, and/or iii) in accordance with the terms applicable for US Federal Government officers or employees acting as part of their official duties; on a worldwide, perpetual, irrevocable, royalty-free basis to BMJ Publishing Group Ltd ("BMJ") its licensees and where the relevant Journal is co-owned by BMJ to the co-owners of the Journal, to publish the Work in this journal and any other BMJ products and to exploit all rights, as set out in our [licence](#).

The Submitting Author accepts and understands that any supply made under these terms is made by BMJ to the Submitting Author unless you are acting as an employee on behalf of your employer or a postgraduate student of an affiliated institution which is paying any applicable article publishing charge ("APC") for Open Access articles. Where the Submitting Author wishes to make the Work available on an Open Access basis (and intends to pay the relevant APC), the terms of reuse of such Open Access shall be governed by a Creative Commons licence – details of these licences and which [Creative Commons](#) licence will apply to this Work are set out in our licence referred to above.

Other than as permitted in any relevant BMJ Author's Self Archiving Policies, I confirm this Work has not been accepted for publication elsewhere, is not being considered for publication elsewhere and does not duplicate material already published. I confirm all authors consent to publication of this Work and authorise the granting of this licence.

1  
2  
3 **Retrospective observational study of the influence of the COVID outbreak on infants'**  
4  
5 **hospitalisation for acute bronchiolitis**  
6  
7

8 Laura Berdah<sup>1,2</sup>, Anne-Sophie Romain<sup>3</sup>, Simon Riviere<sup>4</sup>, Aurélie Schnuriger<sup>2,5</sup>, Marine  
9 Perrier<sup>5</sup>, Ricardo Carbajal<sup>4</sup>, Mathie Lorrot<sup>3,6</sup>, Romain Guedj<sup>4</sup>, Harriet Corvol<sup>1,2</sup>  
10  
11  
12  
13

14 **Affiliations**

- 15  
16  
17 1. Paediatric Pulmonology Department, Trousseau Hospital, Assistance Publique - Hôpitaux de  
18 Paris (AP-HP), Paris, France;  
19  
20 2. Sorbonne Université, Centre de Recherche Saint-Antoine (CRSA), Inserm UMR\_S938,  
21 Paris, France;  
22  
23 3. Department of General Paediatrics, Trousseau Hospital, AP-HP, Sorbonne Université, Paris,  
24 France;  
25  
26 4. Paediatric Emergency Department, Hôpital Trousseau, APHP, Sorbonne Université, Paris,  
27 France;  
28  
29 5. Virology Department, Trousseau Hospital, AP-HP, Paris, France;  
30  
31 6. Eceve, UMR\_S1123, Paris, France.  
32  
33  
34  
35  
36  
37  
38  
39  
40  
41

42 **Address correspondence to:** Harriet Corvol,  
43  
44 Paediatric Pulmonology Department, Trousseau Hospital,  
45  
46 26 avenue du Dr Netter, 75012 Paris, France  
47  
48 harriet.corvol@aphp.fr, Tel: +331-71-73-82-90.  
49  
50  
51  
52

53 **Word count:** 2158

54  
55  
56 **Key words:** infant, acute bronchiolitis, COVID-19, SARS-CoV-2, RSV, acute lower  
57  
58 respiratory infection.  
59  
60

## Abstract

**Objectives.** Acute bronchiolitis is a major public health issue with high number of infants hospitalised worldwide each year. In France, hospitalisations mostly occur between October and March, and peak in December. A reduction of emergency visits for bronchiolitis has been observed at onset of the COVID outbreak. We aimed to assess the pandemic effects on the hospitalisations for bronchiolitis during the 2020-2021 winter (COVID-period) compared to 3 previous winters (pre-COVID).

**Design.** Retrospective, observational and cross-sectional study.

**Setting.** Tertiary university paediatric hospital in Paris (France).

**Participants.** All infants aged under 12-months who were hospitalised for acute bronchiolitis during the autumn/winter seasons (October 1-March 31) from 2017 to 2021 were included. Clinical and laboratory data were collected using standardized forms.

**Results.** During the COVID-period was observed a 54.3% reduction in hospitalisations for bronchiolitis associated with a delayed peak (February instead of November-December). Clinical characteristics and hospitalisation courses were substantially similar. The differences during the COVID period were: smaller proportion of infants with comorbidities (14% vs 8%  $p = 0.02$ ), lower need for oxygen (45% vs 55%,  $p = 0.01$ ), higher proportions of Metapneumovirus, Parainfluenzae 3, Bocavirus, Coronavirus NL63 and OC43 (all  $p \leq 0.01$ ), and no Influenza. The three infants positive for SARS-CoV-2 were also positive for RSV, suggesting that SARS-CoV-2 alone does not cause bronchiolitis, despite previous assumptions.

**Conclusion.** The dramatic reduction in infants' hospitalisations for acute bronchiolitis is an opportunity to change our future habits such as advising the population to wear masks and apply additional hygiene measures in case of respiratory tract infections. This may change the worldwide bronchiolitis burden and improve children respiratory outcomes.

1  
2  
3 **Data availability statement:** Data are available upon reasonable request.  
4  
5  
6  
7

8 **Strengths and limitations of this study**  
9

- 10  
11 • The vast majority of infants admitted to our paediatric hospital between 2017 and 2021  
12 for acute bronchiolitis in their first year after birth will have been identified.  
13  
14  
15  
16 • The clinical and viral characteristics of these infants hospitalised during the COVID-  
17 epidemic season 2020-2021 were compared to those of 3 previous winters.  
18  
19  
20  
21  
22 • Three physicians independently reviewed the medical records to collect clinical data  
23 and laboratory tests results using a standardized specific form.  
24  
25  
26  
27  
28  
29  
30  
31  
32  
33  
34  
35  
36  
37  
38  
39  
40  
41  
42  
43  
44  
45  
46  
47  
48  
49  
50  
51  
52  
53  
54  
55  
56  
57  
58  
59  
60

## Introduction

In autumn and winter in the northern hemisphere, community medicine (paediatricians and general practitioners), as well as emergency and general paediatric departments, are usually overwhelmed by children, especially infants, with acute bronchiolitis (1, 2). Hospital paediatric inpatient departments have to reorganize every winter to handle the high number of infants with this acute lower respiratory infection (ALRI), mostly due to the respiratory syncytial virus (RSV) (1-5). Neonates and young infants often require hospitalisation in general wards, and some even require intensive care unit (ICU) care (2, 6). Moreover, RSV is the third leading cause of death in children aged below 5 years (from ALRI, after pneumonia), secondary to *Streptococcus pneumoniae* and *Haemophilus influenzae* type b (2). Acute bronchiolitis is thus a yearly worldwide public health issue. In France, similar epidemic patterns are seen each year with a large majority of hospitalisations between October and March, with a peak in December (7). Management is largely supportive, focusing on maintaining oxygenation and hydration.

The emergence of the coronavirus disease 2019 (COVID-19) pandemic and the global public health responses related to this pandemic have influenced the viruses' epidemiology. A striking reduction of admission for ALRIs in paediatric ICUs was observed during the winter 2020 in the southern hemisphere (8). In France, collective measures to contain the pandemic have been implemented since mid-March 2020, namely lockdowns, curfews, social distancing, requirement of masks, strict hand hygiene, and restriction of commerce activities. We observed a reduction in the visits to the paediatric emergency department of our hospital for bronchiolitis in the autumn 2020 (9). Here, we aimed to assess the effects of the COVID-19 pandemic on the clinical and viral characteristics of infants hospitalised for bronchiolitis during the epidemic season 2020-2021 (COVID period) compared to previous winters (pre-COVID period).

## Methods

### Study design and patients

This retrospective, observational and cross-sectional study was conducted in the Paediatric University Hospital Armand Trousseau, Assistance Publique Hôpitaux de Paris (APHP), in Paris (France). All infants aged less than 12 months, hospitalised for a first episode of acute bronchiolitis during the autumn/winter seasons (October 1 to March 31) from 2017 to 2021 (*i.e.*, 2017-2018; 2018-2019; 2019-2020; and 2020-2021) were included. Exclusion criteria were age over 12 months, a second episode (or more) of bronchiolitis, and/or an asthma attack. These exclusion criteria were chosen based on the French National Guidelines for bronchiolitis (10). The study was approved by the Institutional Review Board of the French Society for Respiratory Medicine (*Société de Pneumologie de Langue Française*, #CEPRO\_2020-080). In accordance with French laws for observational studies, the requirement for written informed consent was waived (study BronChioVID N°20201119185601).

Patient's selection was performed using the ICD10 code diagnoses of bronchiolitis (J21.0, J21.1, J21.8, and J21.9). Three physicians reviewed the medical records to collect demographic and clinical data as well as laboratory tests results using a standardized specific form. The demographic data collected comprised date of birth, gender and underlying conditions such as prematurity, bronchopulmonary dysplasia, intrauterine growth retardation, congenital heart disease, sickle cell disease, and genetic disease. The clinical data collected at the time of the bronchiolitis episode included date, age, weight, results of the PCR in nasopharyngeal swabs or aspirates for virus identification (Allplex™ Respiratory Panel Assays [Seegene], and/or Simplexa™ Flu A/B & RSV Direct Gen II Kit [Diasorin Molecular]), and medical evolution with duration of the hospitalisation, hospitalisation in ICU, respiratory support



1  
2  
3 (oxygen therapy, high-flow nasal cannula oxygen therapy, non-invasive ventilation, invasive  
4 ventilation, and extracorporeal membrane oxygenation [ECMO]), and nutritional support.  
5  
6  
7  
8  
9

### 10 **Statistical analysis**

11  
12 The normality of the distribution for continuous variables was tested using the Shapiro-  
13 wilk test and was rejected for each variable. Patients' characteristics were described as medians  
14 with interquartile range for continuous variables and percentages for categorical variables. We  
15 compared the patients' characteristics between the pre-COVID periods, defined as October 1  
16 to March 31 2017-2018, 2018-2019, and 2019-2020, with those of the COVID period, defined  
17 as October 1, 2020 to March 31, 2021, by using a chi-square test for categorical variables and  
18 a Mann-Whitney test for continuous variables. The analyses were performed using STATA  
19 14.2.  
20  
21  
22  
23  
24  
25  
26  
27  
28  
29  
30  
31  
32

### 33 **Patient and Public Involvement**

34  
35 Patients or the public were not involved in the design, or conduct, or reporting, or  
36 dissemination plans of our research.  
37  
38  
39  
40  
41  
42  
43  
44  
45  
46  
47  
48  
49  
50  
51  
52  
53  
54  
55  
56  
57  
58  
59  
60

## Results

### Number of hospitalisations

Over the pre-COVID period, 1,347 infants were hospitalised for bronchiolitis in our hospital, with a mean of 449 infants per winter, compared to 205 infants during the COVID period; which corresponds to a 54.3% reduction in the number of hospitalisations (**Table 1**). As shown in **Figure 1**, the bronchiolitis outbreak was delayed during the COVID period, with a peak in the hospitalisations in February, compared to the usual peaks in November-December during the pre-COVID periods.

### Characteristics of the patients

The clinical characteristics of the infants hospitalised for bronchiolitis are shown in **Table 1**. The age distribution and the sex ratio were not significantly different between the pre-COVID and the COVID periods ( $p = 0.7$  and  $0.5$  respectively). During the pre-COVID periods, 14% of the infants presented with comorbidities (with 11% of preterm), whereas only 8% had comorbidities during the COVID period, ( $p = 0.02$ ).

The number of infants who received oxygen therapy was significantly lower during the COVID period than during the pre-COVID period (45% vs 55% respectively,  $p = 0.01$ ). There were no significant differences between the pre-COVID and the COVID periods regarding the length of hospitalisation ( $p = 0.3$ ), the number of patients transferred to a paediatric ICU ( $p = 0.6$ ), and the need for non-invasive ( $p = 0.9$ ) or invasive ventilation ( $p = 0.6$ ).

### Viral epidemiology

PCR in nasopharyngeal swabs for virus identification were performed increasingly across the years ( $p < 0.01$ ) (**Table 2**). RSV remains the most common virus found (74%), followed by Rhinovirus and Adenovirus (**Table 2**). The RSV outbreak was significantly

1  
2  
3 delayed during the COVID period compared to the previous winters, with a plateau between  
4  
5 January and March 2021, compared to peaks in November-December during the pre-COVID  
6  
7 periods (**Figure 1**).  
8  
9

10 The proportion of the following viruses was significantly higher during the COVID  
11 period than during the pre-COVID period: Metapneumovirus ( $p = 0.001$ ), Parainfluenzae 3 ( $p$   
12  $< 0.01$ ), Bocavirus ( $p = 0.001$ ), Coronavirus OC43 ( $p < 0.01$ ) and NL63 ( $p < 0.01$ ) (**Table 2**).  
13  
14 No Influenza (A and B) was found during the COVID period. Only 3 infants with bronchiolitis  
15  
16 had a PCR positive for SARS-CoV-2 in nasopharyngeal swabs during the COVID period, but  
17  
18 all 3 were also positive for RSV.  
19  
20  
21  
22  
23  
24  
25  
26  
27  
28  
29  
30  
31  
32  
33  
34  
35  
36  
37  
38  
39  
40  
41  
42  
43  
44  
45  
46  
47  
48  
49  
50  
51  
52  
53  
54  
55  
56  
57  
58  
59  
60

## Discussion

This study highlights the dramatic reduction in the number of infants who required a hospitalisation for acute bronchiolitis during the COVID-19 outbreak compared to the three previous years. The outbreak of acute bronchiolitis was not only smaller, but also delayed by several weeks. The clinical characteristics of the infants hospitalised for acute bronchiolitis as well as the hospitalisation courses were substantially similar during pre-COVID and COVID periods. While the proportions of RSV and Rhinovirus were similar between both periods, those of Metapneumovirus, Parainfluenzae 3, Bocavirus, Coronavirus NL63 and Coronavirus OC43 increased during the COVID pandemic. Interestingly, during the COVID period, no Influenza was found and the only 3 infants with a PCR positive for SARS-CoV-2 were also positive for RSV, suggesting that SARS-CoV-2 alone does not cause bronchiolitis.

This winter, we observed a strong decrease in the number of hospitalisations for acute bronchiolitis. This observation is consistent with data first from the southern hemisphere, Australia and South America (11, 12), and, more recently, from Europe and North-America (9, 13-16). Several studies reported reductions in the rate of admission to paediatric emergency departments for acute bronchiolitis during the COVID-19 outbreak (9, 14). Results similar to ours were reported in Belgium with a dramatic decrease in bronchiolitis hospitalisations and very limited RSV positive as compared to the last three years (16). Two recent studies also suggest that social distancing and other lockdown strategies are effective in slowing down the spreading of respiratory diseases and decreasing the need for hospitalisation among children (13, 15). Indeed, after reaching France on January 2020, a major progression of COVID-19 led to public health prevention interventions. The first national lockdown officially started on March 17, 2020 and ended on May 10, 2020. Masks had to be worn by persons 11 years of age and older in enclosed public places as of July 20, 2020. As shown in this study, the number of hospitalisations for acute bronchiolitis has therefore drastically decreased, even while schools

1  
2  
3 and nurseries have remained open during winter. A recent publication shows the extent to which  
4 transmission of common paediatric infections can be altered when close contact with other  
5 children is eliminated (17). However, in our study, infants hospitalised for acute bronchiolitis  
6  
7 had a mean age of 3.5 months, so a majority of these infants were not yet in collective nurseries,  
8  
9 but were at home with their mothers (who were on maternity leave). Moreover, since September  
10  
11 2020, professionals in nurseries are required to wear a mask in the presence of children. It can  
12  
13 therefore be suggested that the RSV transmission to these young children can also occur through  
14  
15 their parents or older siblings. Intriguingly, we observed a lower proportion of infants with  
16  
17 comorbidities hospitalised during the COVID period. This could be due to the fact that parents  
18  
19 have protected these at-risk children much more for fear that they would develop severe  
20  
21 infections during the pandemic period.  
22  
23  
24  
25  
26  
27

28 The outbreak of acute bronchiolitis was not only lower, but was also delayed by several  
29 weeks. Besides, RSV emerged in January, after the Christmas break. One explanation might be  
30 that families got together during this celebration break, and social distancing measures might  
31 have been followed less strictly. Interestingly, we observed that while the proportions of RSV  
32 and Rhinovirus were similar to that of previous years during the COVID-19 period, those of  
33 Parainfluenzae 3, Bocavirus, Coronavirus NL63 and Coronavirus OC43 were higher. Our  
34 results on the prevalence of the various respiratory viruses during the pre-COVID period are in  
35 agreement with the literature (18). Moreover, during the COVID period, no Influenza was  
36 found, suggestive that this virus is sensitive to the hygiene measures adopted during the  
37 pandemic. A recent epidemiological study on common communicable diseases in the general  
38 population in France during the COVID pandemic also showed that patients who presented  
39 with ALRI symptoms and underwent a PCR test were most likely infected by Influenza in 2019,  
40 but by SARS-CoV-2 or Metapneumovirus in 2020 (19). Moreover, in contradiction to  
41 assumptions made at the pandemic onset, our data suggest that SARS-CoV-2 alone does not  
42  
43  
44  
45  
46  
47  
48  
49  
50  
51  
52  
53  
54  
55  
56  
57  
58  
59  
60

1  
2  
3 cause bronchiolitis, as the only 3 infants SARS-CoV-2 positive were also positive for RSV. It  
4  
5 will be important to confirm these results in the future, especially if SARS-CoV-2 remains  
6  
7 endemic in the years to come.  
8  
9

10 The high impact of bronchiolitis in terms of cost of hospitalisation is not insignificant.  
11  
12 In Italy, a recent study showed that the main cost item is related to young infants, in particular,  
13  
14 those below 3 months of age, and RSV continues to be the main causative agent of severe  
15  
16 bronchiolitis (20). The authors highlight that new vaccination strategies, such as the extension  
17  
18 of immunoprophylaxis to infants is essential. Therefore, it would be useful, after the COVID-  
19  
20 19 pandemic, for adults to continue to wear masks and wash their hands regularly to mitigate  
21  
22 the risk of transmission of respiratory infection to young children. Acute severe RSV  
23  
24 bronchiolitis in early childhood is associated with long-term morbidities including recurrent  
25  
26 wheezing, asthma, and lower lung function in later life (21). Therefore, the decrease in the  
27  
28 number of severe bronchiolitis cases due to RSV or other viruses might not only have financial  
29  
30 consequences, but also impact the long-term respiratory outcome of children.  
31  
32  
33

34  
35 We are aware of some limitations of our study. The decrease in the number of  
36  
37 hospitalisations may have been partly the consequence of a decrease in the overall number of  
38  
39 emergency room visits since the start of the COVID-19 pandemic. However, it is likely that,  
40  
41 despite the COVID-19 pandemic, children with the most severe respiratory distress were still  
42  
43 seen in the emergency room. In the UK, a significant reduction of non-urgent health care  
44  
45 demands were observed during the pandemic and were associated with an increase in severe  
46  
47 or urgent cases (22).  
48  
49  
50

51 In conclusion, our work provides an overview of the infants' hospitalisations for acute  
52  
53 bronchiolitis during the COVID period in the winter of 2020-2021. This dramatic reduction in  
54  
55 infants' hospitalizations constitutes a great opportunity to change our habits for future autumn  
56  
57 and winter seasons by advising people, especially adults, to wear masks and increase social  
58  
59  
60

1  
2  
3 distancing and hygiene measures in case of upper and lower respiratory tract infections. This  
4  
5 may drastically change the worldwide burden of bronchiolitis and hospitalisations caused by  
6  
7 RSV in the future, as well have important implications for patient outcomes and prevalence of  
8  
9 asthma in children (23). The scientific community should nevertheless keep close surveillance  
10  
11 of RSV epidemics since, as underlined by Di Mattia et al., the increase of an immunologically  
12  
13 naïve population with infants born from mothers who have not reinforced their immunity to  
14  
15 RSV, could lead to greater epidemics in the next winters (24).  
16  
17  
18  
19  
20  
21  
22  
23  
24  
25  
26  
27  
28  
29  
30  
31  
32  
33  
34  
35  
36  
37  
38  
39  
40  
41  
42  
43  
44  
45  
46  
47  
48  
49  
50  
51  
52  
53  
54  
55  
56  
57  
58  
59  
60

For peer review only

## Acknowledgements

The authors would like to thank the medical and nursing staff of the paediatric pulmonology, general paediatric and paediatric emergency departments at Trousseau Hospital, Assistance Publique - Hôpitaux de Paris (AP-HP), Sorbonne Université, Paris, France.

**Contributors:** LB and HC conceptualized and designed the study, collected the data, drafted the initial manuscript, and reviewed and revised the manuscript. RG designed the data collection, collected data, carried out the statistical analyses, and reviewed and revised the manuscript. ASR, SR, AS, MP, ML, RC participated in the study conceptualization and data collection. They also reviewed and revised the manuscript. All authors approved the final manuscript as submitted and agree to be accountable for all aspects of the work.

**Competing Interests:** The authors have no conflicts of interest to disclose.

**Funding:** No funding was secured for this study.

**Conflict of Interest Disclosures:** The authors have no conflicts of interest to disclose.



1  
2  
3 **Figure's caption**  
4  
5  
6

7 **Figure 1.** Evolution of the number of RSV and Rhinovirus cases during the pre-COVID period  
8 (between 2017 and 2020) and the COVID period (2020-2021)  
9  
10  
11  
12  
13  
14  
15  
16  
17  
18  
19  
20  
21  
22  
23  
24  
25  
26  
27  
28  
29  
30  
31  
32  
33  
34  
35  
36  
37  
38  
39  
40  
41  
42  
43  
44  
45  
46  
47  
48  
49  
50  
51  
52  
53  
54  
55  
56  
57  
58  
59  
60

For peer review only

## References

1. Florin TA, Plint AC, Zorc JJ. Viral bronchiolitis. *Lancet*. 2017;389(10065):211-24.
2. Nair H, Nokes DJ, Gessner BD, Dherani M, Madhi SA, Singleton RJ, et al. Global burden of acute lower respiratory infections due to respiratory syncytial virus in young children: a systematic review and meta-analysis. *Lancet*. 2010;375(9725):1545-55.
3. Wright M, Piedimonte G. Respiratory syncytial virus prevention and therapy: past, present, and future. *Pediatr Pulmonol*. 2011;46(4):324-47.
4. Bont L, Checchia PA, Fauroux B, Figueras-Aloy J, Manzoni P, Paes B, et al. Defining the Epidemiology and Burden of Severe Respiratory Syncytial Virus Infection Among Infants and Children in Western Countries. *Infect Dis Ther*. 2016;5(3):271-98.
5. Obando-Pacheco P, Justicia-Grande AJ, Rivero-Calle I, Rodriguez-Tenreiro C, Sly P, Ramilo O, et al. Respiratory Syncytial Virus Seasonality: A Global Overview. *J Infect Dis*. 2018;217(9):1356-64.
6. Nair H, Simoes EA, Rudan I, Gessner BD, Azziz-Baumgartner E, Zhang JSF, et al. Global and regional burden of hospital admissions for severe acute lower respiratory infections in young children in 2010: a systematic analysis. *Lancet*. 2013;381(9875):1380-90.
7. Che D, Nicolau J, Bergounioux J, Perez T, Bitar D. [Bronchiolitis among infants under 1 year of age in France: epidemiology and factors associated with mortality]. *Arch Pediatr*. 2012;19(7):700-6.
8. Vasquez-Hoyos P, Diaz-Rubio F, Monteverde-Fernandez N, Jaramillo-Bustamante JC, Carvajal C, Serra A, et al. Reduced PICU respiratory admissions during COVID-19. *Arch Dis Child*. 2020.
9. Guedj R, Lorrot M, Lecarpentier T, Leger PL, Corvol H, Carbajal R. Infant bronchiolitis dramatically reduced during the second French COVID-19 outbreak. *Acta Paediatr*. 2021;110(4):1297-9.

- 1  
2  
3 10. Prise en charge du 1er épisode de bronchiolite aiguë chez le nourrisson de moins de 12  
4 mois. Recommandations pour la pratique clinique. Available at [https://www.has-](https://www.has-sante.fr/upload/docs/application/pdf/2019-11/hascnpp_bronchiolite_texte_recommandations_2019.pdf)  
5 [sante.fr/upload/docs/application/pdf/2019-](https://www.has-sante.fr/upload/docs/application/pdf/2019-11/hascnpp_bronchiolite_texte_recommandations_2019.pdf)  
6 [11/hascnpp\\_bronchiolite\\_texte\\_recommandations\\_2019.pdf](https://www.has-sante.fr/upload/docs/application/pdf/2019-11/hascnpp_bronchiolite_texte_recommandations_2019.pdf).  
7  
8  
9
- 10  
11  
12 11. Britton PN, Hu N, Saravanos G, Shrapnel J, Davis J, Snelling T, et al. COVID-19 public  
13 health measures and respiratory syncytial virus. *Lancet Child Adolesc Health*. 2020;4(11):e42-  
14 e3.  
15  
16  
17
- 18  
19 12. Nascimento MS, Baggio DM, Fascina LP, do Prado C. Impact of social isolation due to  
20 COVID-19 on the seasonality of pediatric respiratory diseases. *PLoS One*.  
21 2020;15(12):e0243694.  
22  
23  
24
- 25  
26 13. Angoulvant F, Ouldali N, Yang DD, Filser M, Gajdos V, Rybak A, et al. COVID-19  
27 pandemic: Impact caused by school closure and national lockdown on pediatric visits and  
28 admissions for viral and non-viral infections, a time series analysis. *Clin Infect Dis*. 2020.  
29  
30  
31
- 32  
33 14. Curatola A, Lazzareschi I, Bersani G, Covino M, Gatto A, Chiaretti A. Impact of  
34 COVID-19 outbreak in acute bronchiolitis: Lesson from a tertiary Italian Emergency  
35 Department. *Pediatr Pulmonol*. 2021;56(8):2484-8.  
36  
37  
38
- 39  
40 15. Hatoun J, Correa ET, Donahue SMA, Vernacchio L. Social Distancing for COVID-19  
41 and Diagnoses of Other Infectious Diseases in Children. *Pediatrics*. 2020;146(4).  
42  
43  
44
- 45  
46 16. Van Brusselen D, De Troeyer K, Ter Haar E, Vander Auwera A, Poschet K, Van Nuijs  
47 S, et al. Bronchiolitis in COVID-19 times: a nearly absent disease? *Eur J Pediatr*.  
48 2021;180(6):1969-73.  
49  
50
- 51  
52 17. Sakamoto H, Ishikane M, Ueda P. Seasonal Influenza Activity During the SARS-CoV-2  
53 Outbreak in Japan. *JAMA*. 2020;323(19):1969-71.  
54  
55
- 56  
57 18. Kenmoe S, Kengne-Nde C, Ebogo-Belobo JT, Mbaga DS, Fatawou Modiyinji A,  
58 Njouom R. Systematic review and meta-analysis of the prevalence of common respiratory  
59  
60

1  
2  
3 viruses in children < 2 years with bronchiolitis in the pre-COVID-19 pandemic era. PLoS One.  
4  
5 2020;15(11):e0242302.  
6

7  
8 19. Launay T, Souty C, Vilcu AM, Turbelin C, Blanchon T, Guerrisi C, et al. Common  
9  
10 communicable diseases in the general population in France during the COVID-19 pandemic.  
11  
12 PLoS One. 2021;16(10):e0258391.  
13

14  
15 20. Bozzola E, Ciarlito C, Guolo S, Brusco C, Cerone G, Antilici L, et al. Respiratory  
16  
17 Syncytial Virus Bronchiolitis in Infancy: The Acute Hospitalization Cost. Front Pediatr.  
18  
19 2020;8:594898.  
20

21  
22 21. Kitcharoensakkul M, Bacharier LB, Schweiger TL, Wilson B, Goss CW, Lew D, et al.  
23  
24 Lung function trajectories and bronchial hyperresponsiveness during childhood following  
25  
26 severe RSV bronchiolitis in infancy. *Pediatr Allergy Immunol.* 2021;32(3):457-64.  
27

28  
29 22. Valitutti F, Zenzeri L, Mauro A, Pacifico R, Borrelli M, Muzzica S, et al. Effect of  
30  
31 Population Lockdown on Pediatric Emergency Room Demands in the Era of COVID-19. *Front*  
32  
33 *Pediatr.* 2020;8:521.  
34

35  
36 23. Shi T, McAllister DA, O'Brien KL, Simoes EAF, Madhi SA, Gessner BD, et al. Global,  
37  
38 regional, and national disease burden estimates of acute lower respiratory infections due to  
39  
40 respiratory syncytial virus in young children in 2015: a systematic review and modelling study.  
41  
42 *Lancet.* 2017;390(10098):946-58.  
43

44  
45 24. Di Mattia G, Nenna R, Mancino E, Rizzo V, Pierangeli A, Villani A, et al. During the  
46  
47 COVID-19 pandemic where has respiratory syncytial virus gone? *Pediatr Pulmonol.*  
48  
49 2021;56(10):3106-9.  
50  
51  
52  
53  
54  
55  
56  
57  
58  
59  
60

## Tables

**Table 1.** Clinical characteristics of the infants hospitalised for acute bronchiolitis in a tertiary university paediatric hospital in Paris (France) between 2017 and 2021

|                                                  | Pre-COVID period |               |               | COVID period              |               | P-value*    |
|--------------------------------------------------|------------------|---------------|---------------|---------------------------|---------------|-------------|
|                                                  | 2017-2018        | 2018-2019     | 2019-2020     | 2017-2020 aggregated data | 2020-2021     |             |
| <b>Number of infants, n</b>                      | <b>479</b>       | <b>451</b>    | <b>417</b>    | <b>1347</b>               | <b>205</b>    | -           |
| <b>Age (months): median (IQR)</b>                | 2.8 (1.5-4.9)    | 2.6 (1.4-4.8) | 2.4 (1.3-4.4) | 2.5 (1.4-4.7)             | 2.7 (1.5-4.7) | 0.7         |
| <b>Gender: boys, n (%)</b>                       | 279 (58.2)       | 249 (55.2)    | 244 (58.5)    | 772 (57)                  | 119 (58)      | 0.5         |
| <b>Comorbidities, n (%)</b>                      | 66 (14)          | 66 (15)       | 53 (13)       | 185 (14)                  | 16 (8)        | <b>0.02</b> |
| <b>Weight (kg): median (IQR)</b>                 | 5.6 (4.4-6.9)    | 5.5 (4.6-7.0) | 5.4 (4.3-7.0) | 5.5 (4.4-7.0)             | 5.7 (4.5-6.9) | 0.6         |
| <b>Evolution</b>                                 |                  |               |               |                           |               |             |
| Duration of hospitalisation (days), median (IQR) | 2.4 (1.2-4.0)    | 3.0 (2.0-4.0) | 3.9 (2.0-5.0) | 3.0 (2.0-4.9)             | 3.0 (1.5-4.2) | 0.3         |
| Oxygen therapy, n (%)                            | 259 (54)         | 237 (52)      | 257 (61)      | 753 (56)                  | 93 (45)       | <b>0.01</b> |
| Intensive Care Unit, n (%)                       | 48 (13)          | 42 (9)        | 67 (16)       | 157 (12)                  | 21 (11)       | 0.6         |
| <i>Non-invasive ventilation, n (%)</i>           | 42 (8)           | 38 (8)        | 67 (16)       | 147 (11)                  | 22 (12)       | 0.9         |
| <i>Invasive ventilation, n (%)</i>               | 5 (1)            | 5 (1)         | 7 (1.6)       | 17 (1.2)                  | 3 (1.7)       | 0.6         |
| <i>Extracorporeal circulation, n (%)</i>         | 2 (0.4)          | 0 (0)         | 2 (0.4)       | 4 (0.2)                   | 0 (0)         | 0.4         |

\*P-value for the comparison between pre-COVID aggregated data and COVID data using chi-square test for categorical variables and Mann-Whitney test for continuous variables.

**Table 2.** Results of the PCR performed in nasopharyngeal swabs for virus identification in the infants hospitalised in paediatric general wards for acute bronchiolitis between 2017 and 2021

|                                     | Pre-COVID         |                   |                   | 2017-2020<br>aggregated<br>data | Post-<br>COVID    | P-<br>value*     |
|-------------------------------------|-------------------|-------------------|-------------------|---------------------------------|-------------------|------------------|
|                                     | 2017-2018         | 2018-2019         | 2019-2020         |                                 | 2020-2021         |                  |
| <b>Number of infants, n</b>         | <b>479</b>        | <b>451</b>        | <b>417</b>        | <b>1347</b>                     | <b>205</b>        |                  |
| <b>Nasal PCR<sup>s</sup>, n (%)</b> | <b>245 (51.1)</b> | <b>274 (60.7)</b> | <b>281 (67.4)</b> | <b>800 (59.4)</b>               | <b>167 (74.2)</b> | <b>&lt; 0.01</b> |
| <i>Respiratory syncytial virus</i>  | 193 (78)          | 202 (73)          | 211 (75)          | 606 (75)                        | 120 (71)          | 0.3              |
| <i>Rhinovirus</i>                   | 41 (17)           | 65 (24)           | 63 (22)           | 169 (12)                        | 44 (21)           | 0.1              |
| <i>Adenovirus</i>                   | 17 (7)            | 10 (4)            | 14 (5)            | 16 (11)                         | 12 (7)            | 0.3              |
| <i>Metapneumovirus</i>              | 17 (7)            | 10 (4)            | 10 (4)            | 37 (2.7)                        | 19 (11)           | <b>0.001</b>     |
| <i>Influenzae A</i>                 | 0 (0)             | 2 (0.4)           | 1 (0.2)           | 3 (0.2)                         | 0 (0)             | 0.4              |
| <i>Influenzae B</i>                 | 0 (0)             | 2 (0.7)           | 1 (0.3)           | 3 (0.2)                         | 0 (0)             | 0.4              |
| <i>Parainfluenzae 3</i>             | 9 (4)             | 6 (2)             | 10 (4)            | 27 (2)                          | 16 (10)           | <b>&lt; 0.01</b> |
| <i>Bocavirus</i>                    | 6 (2)             | 11 (4)            | 7 (2)             | 24 (1.7)                        | 14 (8)            | <b>0.001</b>     |
| <i>SARS CoV-2</i>                   | 0 (0)             | 0 (0)             | 0 (0)             | 0 (0)                           | 3 (2)             | <b>0.02</b>      |
| <i>Coronavirus NL63</i>             | 2 (0.8)           | 5 (2)             | 3 (1)             | 10 (0.7)                        | 9 (5)             | <b>&lt; 0.01</b> |
| <i>Coronavirus OC43</i>             | 0 (0)             | 1 (0.3)           | 2 (0.7)           | 3 (0.2)                         | 7 (4)             | <b>&lt; 0.01</b> |
| <b>No PCR, n (%)</b>                | <b>234 (48.8)</b> | <b>177 (39)</b>   | <b>136 (32)</b>   | <b>547 (40)</b>                 | <b>38 (18)</b>    | <b>&lt; 0.01</b> |

\*P-value for the comparison between pre-COVID aggregated data and COVID data using chi-square test. <sup>s</sup>Virus identifications by PCR in nasopharyngeal swabs or aspirates were performed by means of Allplex Respiratory Panel Assays (Seegene) and/or Simplexa™ Flu A/B & RSV Direct Gen II Kit (Diasorin Molecular).

1  
2  
3  
4  
5  
6  
7  
8  
9  
10  
11  
12  
13  
14  
15  
16  
17  
18  
19  
20  
21  
22  
23  
24  
25  
26  
27  
28  
29  
30  
31  
32  
33  
34  
35  
36  
37  
38  
39  
40  
41  
42  
43  
44  
45  
46



Supplement: bmjopen-2021-059626.draft_revisions.pdf [file bmjopen-2021-059626.draft_revisions.pdf]
